# Supplementary material for: Interaction of CYP3A4 with Rationally Designed Ritonavir Analogues: Impact of Steric Constraints Imposed on the Heme-Ligating Group and the End-Pyridine Attachment
Source: MDPI journal article supplement (doi:10.3390/ijms23137291), 2022-06-30

# Interaction of human drug-metabolizing CYP3A4 with rationally designed ritonavir analogues: Impact of steric constraints imposed on the heme-ligating group and the end-pyridine attachment

Eric R. Samuels and Irina F. Sevrioukova

## SUPPLEMENTARY MATERIALS

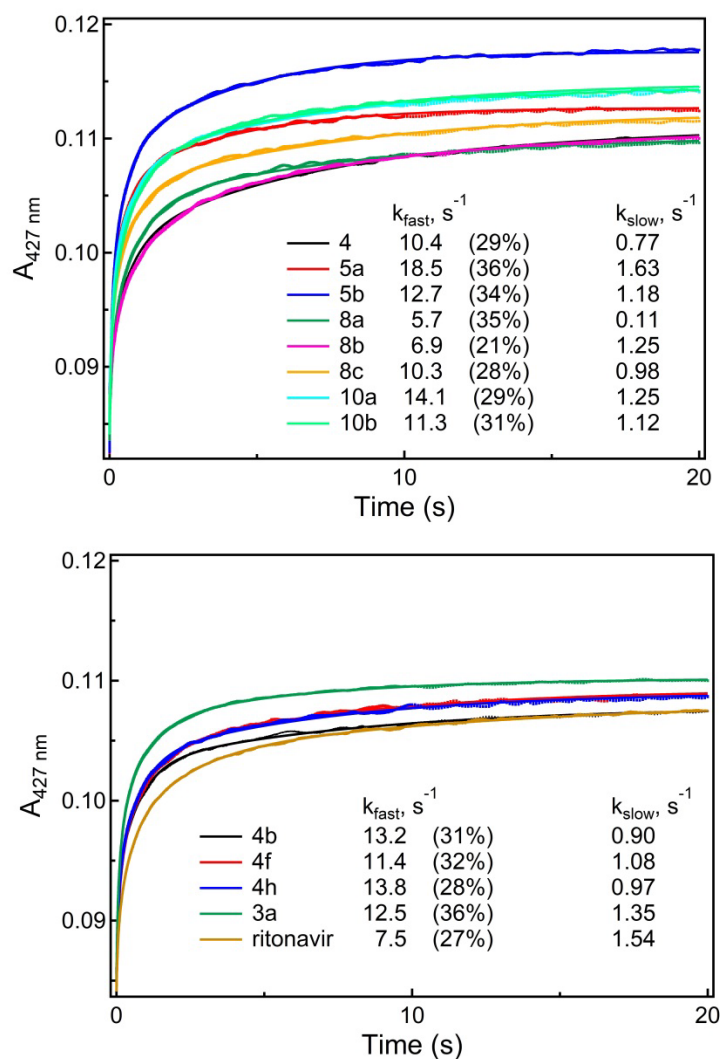

**Figure S1.** Kinetics of ligand binding to CYP3A4. Kinetic traces were recorded by mixing 2  $\mu\text{M}$  CYP3A4 with 20  $\mu\text{M}$  solutions of series VI analogues (upper panel) or previously reported compounds and ritonavir (lower panel). Within the studied time interval, all reactions were biphasic. Fittings are shown as solid lines. The derived rate constants for the fast and slow phases and the percentage of the fast phase are indicated.

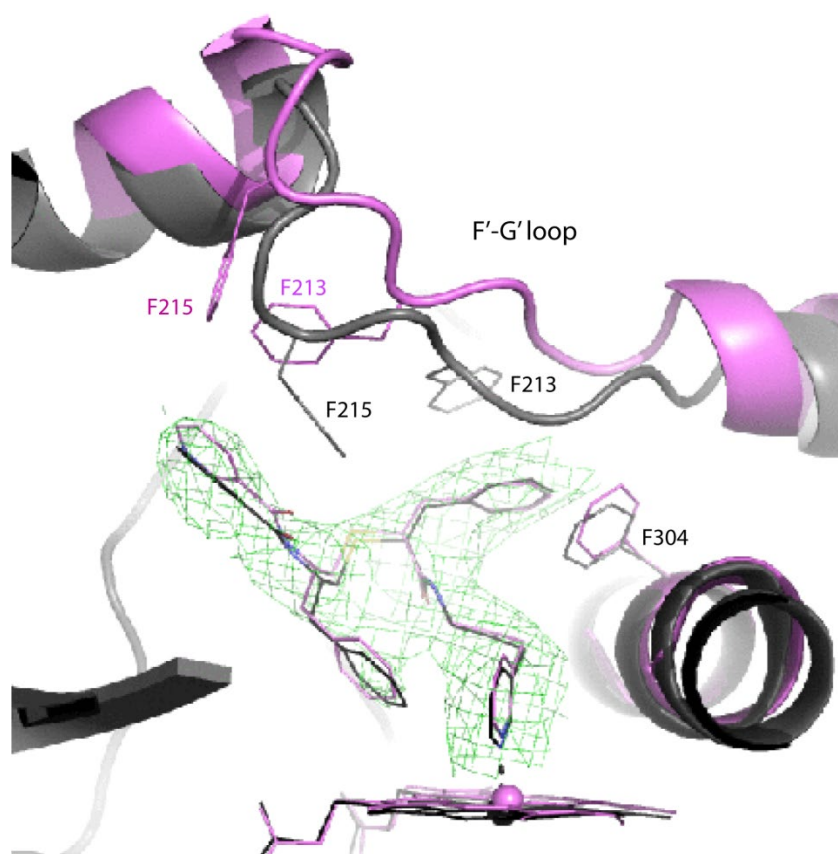

**Figure S2.** Superposition of **10a**-bound CYP3A4 crystallized in the I222 (magenta) and C2 space group (gray; molecule A). The ligand binding mode is only slightly affected by differences in crystal packing. Green mesh is polder omit electron density map contoured at 3  $\sigma$  level.

**Table S1.** Data collection and refinement statistics

| Ligand                                           | <b>5a</b>                                                                | <b>5b</b>                                                                | <b>8a</b>                                                                | <b>8b</b>                                                                |
|--------------------------------------------------|--------------------------------------------------------------------------|--------------------------------------------------------------------------|--------------------------------------------------------------------------|--------------------------------------------------------------------------|
| CYP3A4                                           | WT                                                                       | WT                                                                       | WT                                                                       | WT                                                                       |
| PDB ID                                           | 7UF9                                                                     | 7UFA                                                                     | 7UFB                                                                     | 7UFC                                                                     |
| <i>Data statistics</i>                           |                                                                          |                                                                          |                                                                          |                                                                          |
| Space group                                      | I222                                                                     | I222                                                                     | I222                                                                     | I222                                                                     |
| Unit cell                                        | <i>a, b, c</i> = 77 x 101 x 128 Å;<br>$\alpha, \beta, \gamma = 90^\circ$ | <i>a, b, c</i> = 77 x 102 x 126 Å;<br>$\alpha, \beta, \gamma = 90^\circ$ | <i>a, b, c</i> = 77 x 102 x 128 Å;<br>$\alpha, \beta, \gamma = 90^\circ$ | <i>a, b, c</i> = 78 x 103 x 128 Å;<br>$\alpha, \beta, \gamma = 90^\circ$ |
| Resolution range (Å)                             | 79.53-2.45 (2.58-2.45) <sup>a</sup>                                      | 50.86-2.50 (2.64-2.50)                                                   | 79.62-2.25 (2.37-2.25)                                                   | 80.35-2.35 (2.48-2.35)                                                   |
| Total reflections                                | 82,809 (12,979)                                                          | 124,746 (17,945)                                                         | 186,616 (26,677)                                                         | 82,093 (12,824)                                                          |
| Unique reflections                               | 18,319 (2,694)                                                           | 17,305 (2,503)                                                           | 24,033 (3,473)                                                           | 20,611 (3,070)                                                           |
| Redundancy                                       | 4.5 (4.6)                                                                | 7.2 (7.2)                                                                | 7.8 (7.7)                                                                | 4.0 (4.2)                                                                |
| Completeness                                     | 98.1 (99.5)                                                              | 99.8 (100.0)                                                             | 99.5 (99.6)                                                              | 95.3 (98.0)                                                              |
| Average <i>I</i> / $\sigma$                      | 12.5 (1.1)                                                               | 9.8 (1.0)                                                                | 13.8 (1.3)                                                               | 9.2 (1.1)                                                                |
| R <sub>merge</sub>                               | 0.047 (1.630)                                                            | 0.089 (2.524)                                                            | 0.059 (1.604)                                                            | 0.066 (2.695)                                                            |
| R <sub>pim</sub>                                 | 0.024 (0.842)                                                            | 0.036 (1.006)                                                            | 0.022 (0.610)                                                            | 0.036 (1.362)                                                            |
| CC ½                                             | 0.999 (0.416)                                                            | 0.998 (0.403)                                                            | 0.999 (0.395)                                                            | 0.994 (0.480)                                                            |
| <i>Refinement statistics</i>                     |                                                                          |                                                                          |                                                                          |                                                                          |
| <i>R</i> / <i>R</i> <sub>free</sub> <sup>b</sup> | 22.5/25.5                                                                | 24.7/28.4                                                                | 21.0/25.8                                                                | 20.8/25.4                                                                |
| Number of atoms:                                 |                                                                          |                                                                          |                                                                          |                                                                          |
| Protein                                          | 3645                                                                     | 3735                                                                     | 3350                                                                     | 3727                                                                     |
| Solvent                                          | 0                                                                        | 6                                                                        | 20                                                                       | 7                                                                        |
| R.m.s. deviations                                |                                                                          |                                                                          |                                                                          |                                                                          |
| Bond lengths, Å                                  | 0.004                                                                    | 0.003                                                                    | 0.003                                                                    | 0.003                                                                    |
| Bond angles, °                                   | 0.634                                                                    | 0.558                                                                    | 0.517                                                                    | 0.535                                                                    |
| Wilson B-factor, Å <sup>2</sup>                  | 85                                                                       | 79                                                                       | 70                                                                       | 77                                                                       |
| Average <i>B</i> -factor, Å <sup>2</sup> :       |                                                                          |                                                                          |                                                                          |                                                                          |
| Protein                                          | 119                                                                      | 119                                                                      | 101                                                                      | 107                                                                      |
| Ligand                                           | 137                                                                      | 119                                                                      | 102                                                                      | 107                                                                      |
| Ramachandran plot <sup>d</sup> (residues; %)     |                                                                          |                                                                          |                                                                          |                                                                          |
| Preferred                                        | 413 (94.3%)                                                              | 421 (94.6%)                                                              | 445 (96.7%)                                                              | 434 (96.2%)                                                              |
| Allowed                                          | 23 (5.2%)                                                                | 23 (5.2%)                                                                | 15 (3.3%)                                                                | 27 (3.8%)                                                                |
| Outliers                                         | 2 (0.5%)                                                                 | 1 (0.2%)                                                                 | none                                                                     | none                                                                     |

<sup>a</sup>Values in brackets are for the highest resolution shell.<sup>b</sup>*R*<sub>free</sub> was calculated from a subset of 5% of the data that were excluded during refinement.<sup>c</sup>Values for two molecules in the asymmetric unit.<sup>d</sup>Analyzed with PROCHECK.

**Table S2.** Data collection and refinement statistics

| Ligand                                           | <b>8c</b>                                                | <b>10a</b>                                                           | <b>10b</b>                                                           |
|--------------------------------------------------|----------------------------------------------------------|----------------------------------------------------------------------|----------------------------------------------------------------------|
| CYP3A4                                           | WT                                                       | K421A/K424A                                                          | K421A/K424A                                                          |
| PDB ID                                           | 7UFD                                                     | 7UFE                                                                 | 7UFF                                                                 |
| <i>Data statistics</i>                           |                                                          |                                                                      |                                                                      |
| Space group                                      | I222                                                     | C2                                                                   | C2                                                                   |
| Unit cell                                        | <i>a, b, c</i> = 78 x103 x 130 Å;<br><i>α, β, γ</i> = 90 | <i>a, b, c</i> = 154 x 97 x 94 Å;<br><i>α, β, γ</i> = 90 x 124 x 90° | <i>a, b, c</i> = 157 x 98 x 95 Å;<br><i>α, β, γ</i> = 90 x 125 x 90° |
| Resolution range (Å)                             | 80.52-2.90 (3.06-2.90) <sup>a</sup>                      | 77.63-2.40 (2.53-2.40)                                               | 77.75-2.70 (2.85-2.70)                                               |
| Total reflections                                | 57,848 (8,841)                                           | 148,105 (22,323)                                                     | 183,071 (22,905)                                                     |
| Unique reflections                               | 11,818 (1,714)                                           | 43,861 (6,382)                                                       | 30,683 (4,113)                                                       |
| Redundancy                                       | 4.9 (5.2)                                                | 3.4 (3.5)                                                            | 6.0 (5.5)                                                            |
| Completeness                                     | 99.8 (99.9)                                              | 98.7 (98.9)                                                          | 95.1 (88.6)                                                          |
| Average <i>I</i> / <i>σ</i>                      | 6.3 (2.5)                                                | 8.3 (1.1)                                                            | 8.5 (1.0)                                                            |
| R <sub>merge</sub>                               | 0.174 (1.203)                                            | 0.063 (1.257)                                                        | 0.115 (1.774)                                                        |
| R <sub>pim</sub>                                 | 0.089 (0.570)                                            | 0.039 (0.777)                                                        | 0.050 (0.818)                                                        |
| CC ½                                             | 0.972 (0.354)                                            | 0.998 (0.506)                                                        | 0.997 (0.405)                                                        |
| <i>Refinement statistics</i>                     |                                                          |                                                                      |                                                                      |
| <i>R</i> / <i>R</i> <sub>free</sub> <sup>b</sup> | 20.1/27.8                                                | 22.1/25.3                                                            | 24.4/28.1                                                            |
| Number of atoms:                                 |                                                          |                                                                      |                                                                      |
| Protein                                          | 3727                                                     | 3706/3575 <sup>c</sup>                                               | 3685/3575 <sup>c</sup>                                               |
| Solvent                                          | 0                                                        | 53                                                                   | 13                                                                   |
| R.m.s. deviations                                | 0.002                                                    | 0.002                                                                | 0.002                                                                |
| Bond angles, °                                   | 0.476                                                    | 0.503                                                                | 0.511                                                                |
| Wilson B-factor, Å <sup>2</sup>                  | 94                                                       | 71                                                                   | 83                                                                   |
| Average <i>B</i> -factor, Å <sup>2</sup> :       |                                                          |                                                                      |                                                                      |
| Protein                                          | 107                                                      | 90/111 <sup>c</sup>                                                  | 92/123 <sup>c</sup>                                                  |
| Ligand                                           | 103                                                      | 80/90 <sup>c</sup>                                                   | 83/115 <sup>c</sup>                                                  |
| Ramachandran plot <sup>d</sup> (residues; %)     |                                                          |                                                                      |                                                                      |
| Preferred                                        | 429 (95.1%)                                              | 820 (92.3%)                                                          | 822 (93.3%)                                                          |
| Allowed                                          | 22 (4.9%)                                                | 67 (7.6%)                                                            | 58 (6.6%)                                                            |
| Outliers                                         | none                                                     | 1 (0.1%)                                                             | 1 (0.1%)                                                             |

<sup>a</sup>Values in brackets are for the highest resolution shell.<sup>b</sup>*R*<sub>free</sub> was calculated from a subset of 5% of the data that were excluded during refinement.<sup>c</sup>Values for two molecules in the asymmetric unit.<sup>d</sup>Analyzed with PROCHECK.

**Table S3.** Local correlation coefficients (CC) and  $CC_{\text{peak}}$  between three polder maps ( $F_{\text{obs}} = |F_{\text{model}}|$ )

Map 1 (m1), calculated  $F_{\text{obs}}$  assuming that the omitted ligand atoms are present. Map 2 (m2), calculated  $F_{\text{obs}}$  assuming that the omitted ligand atoms are not present. Map 3 (m3), polder map calculated using the experimental data.

|               |      | m1-m2  |                    | m1-m3  |                    | m2-m3  |                    |
|---------------|------|--------|--------------------|--------|--------------------|--------|--------------------|
| Ligand/PDB ID |      | CC     | $CC_{\text{peak}}$ | CC     | $CC_{\text{peak}}$ | CC     | $CC_{\text{peak}}$ |
| <b>5a</b>     | 7UF9 | 0.6992 | 0.6672             | 0.9230 | 0.8715             | 0.6336 | 0.5914             |
| <b>5b</b>     | 7UFA | 0.4962 | 0.4570             | 0.8256 | 0.7698             | 0.4460 | 0.4101             |
| <b>8a</b>     | 7UFB | 0.7025 | 0.7522             | 0.9062 | 0.8803             | 0.7123 | 0.7491             |
| <b>8b</b>     | 7UFC | 0.5861 | 0.5493             | 0.8972 | 0.8544             | 0.5939 | 0.5425             |
| <b>8c</b>     | 7UFD | 0.6629 | 0.6702             | 0.9049 | 0.8783             | 0.5949 | 0.6046             |
| <b>10a</b>    | 7UFE | 0.5353 | 0.5100             | 0.9200 | 0.8496             | 0.5071 | 0.4826             |
| <b>10b</b>    | 7UFF | 0.5257 | 0.5584             | 0.8700 | 0.8496             | 0.4717 | 0.4749             |

Correlation coefficients for polder maps were calculated with PHENIX.

For all ligands, pairwise comparisons of correlation coefficients indicate that m3 correlates best with m1. This means that the polder maps m3 (displayed in Figures 3, 5 and 7 of the main text) show the omitted ligand atoms.\*

\*Liebschner D., Afonine P.V.; Moriarty N.W.; Poon B.K.; Sobolev O.V.; Terwilliger T.C.; Adams P.D. Polder maps: improving OMIT maps by excluding bulk solvent. *Struct. Biol.* **2016**, D73, 148-157.

3124\_a (0.019) Is (1.00,0.01) C<sub>30</sub>H<sub>37</sub>N<sub>4</sub>O<sub>4</sub>S

TOF MS ES+  
6.62e12

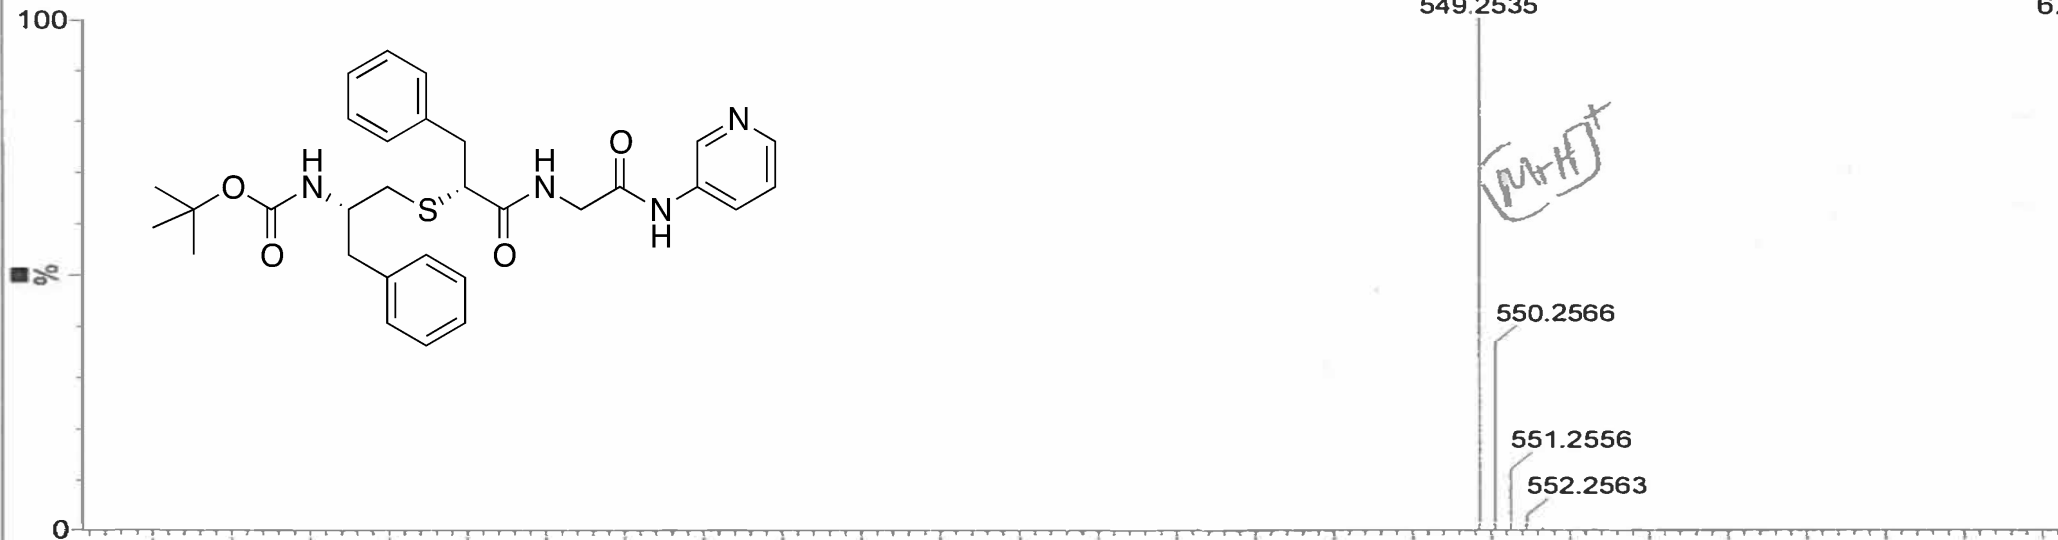

3124\_a 23 (0.422) AM (Cen,5, 80.00, Ar,8000.0,481.26,0.70); Sm (SG, 2x3.00); Sb (1,40.00 ); Cm (19:33)

TOF MS ES+  
5.96e3

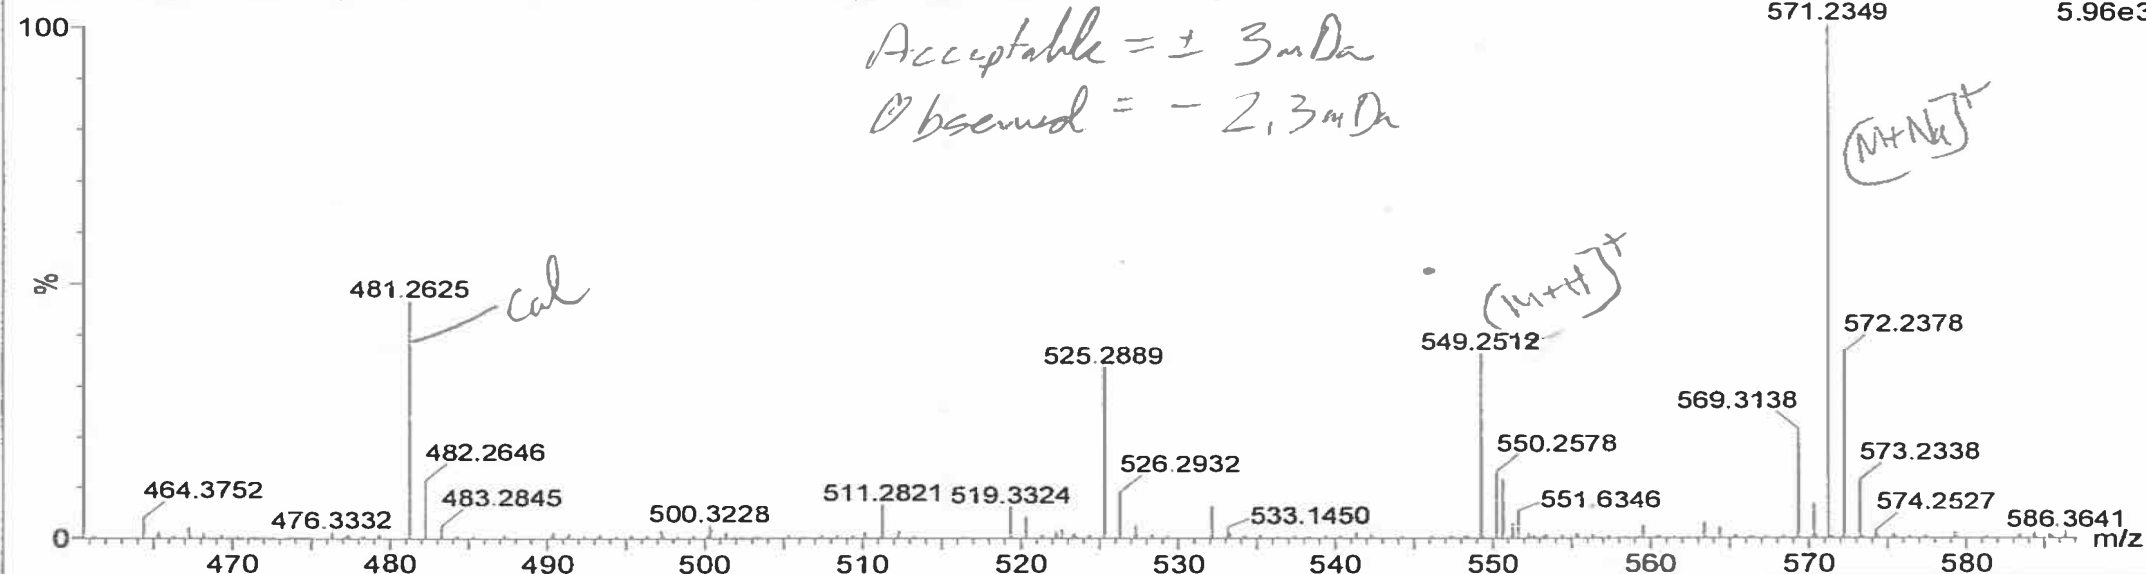

408\_a (0.019) Is (1.00,0.01) C<sub>30</sub>H<sub>37</sub>N<sub>3</sub>O<sub>3</sub>Na

TOF MS ES+  
6.66e12

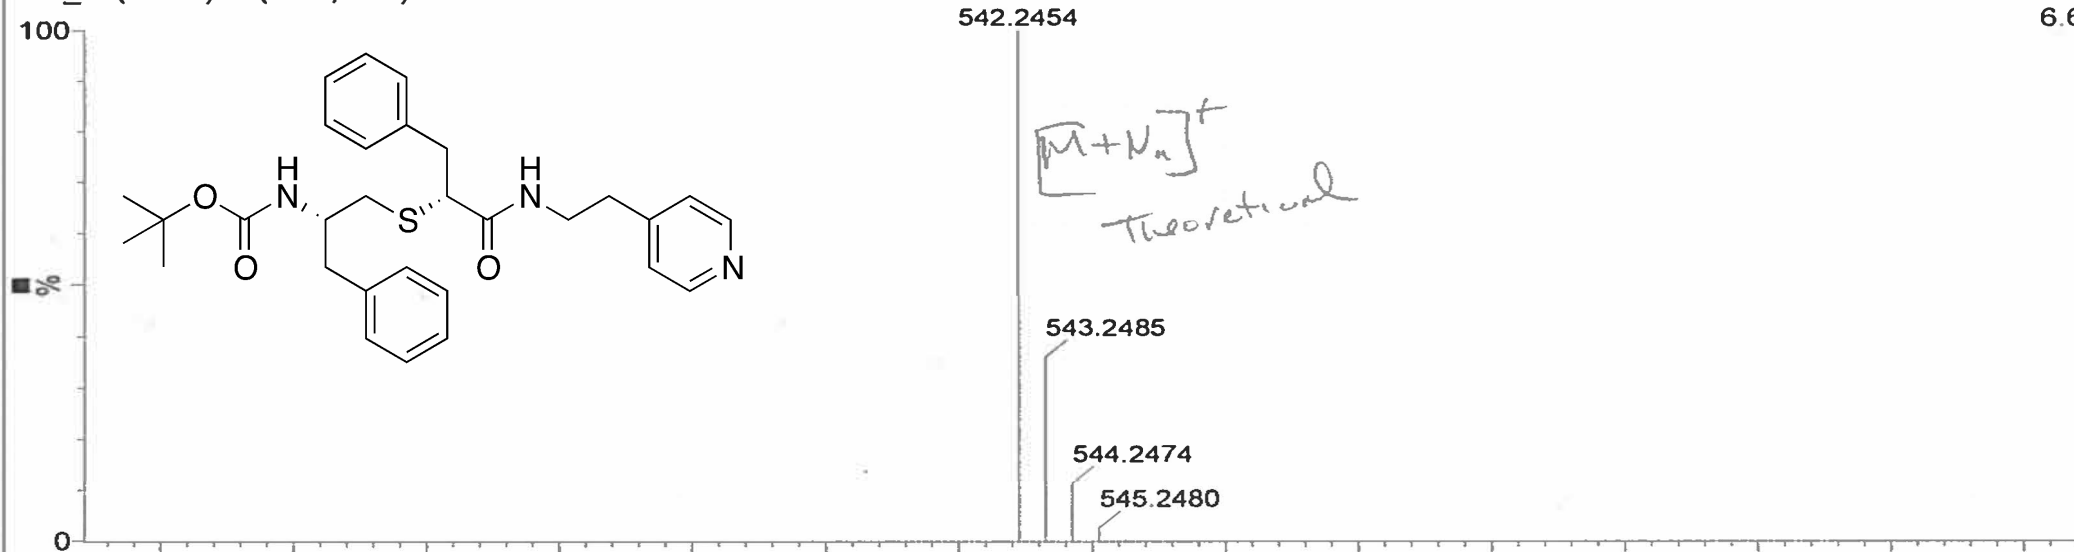

408\_a 21 (0.385) AM (Cen,5, 80.00, Ar,8000.0,525.29,0.70); Sm (SG, 2x3.00); Sb (1,40.00); Cm (21:26)

TOF MS ES+  
4.85e4

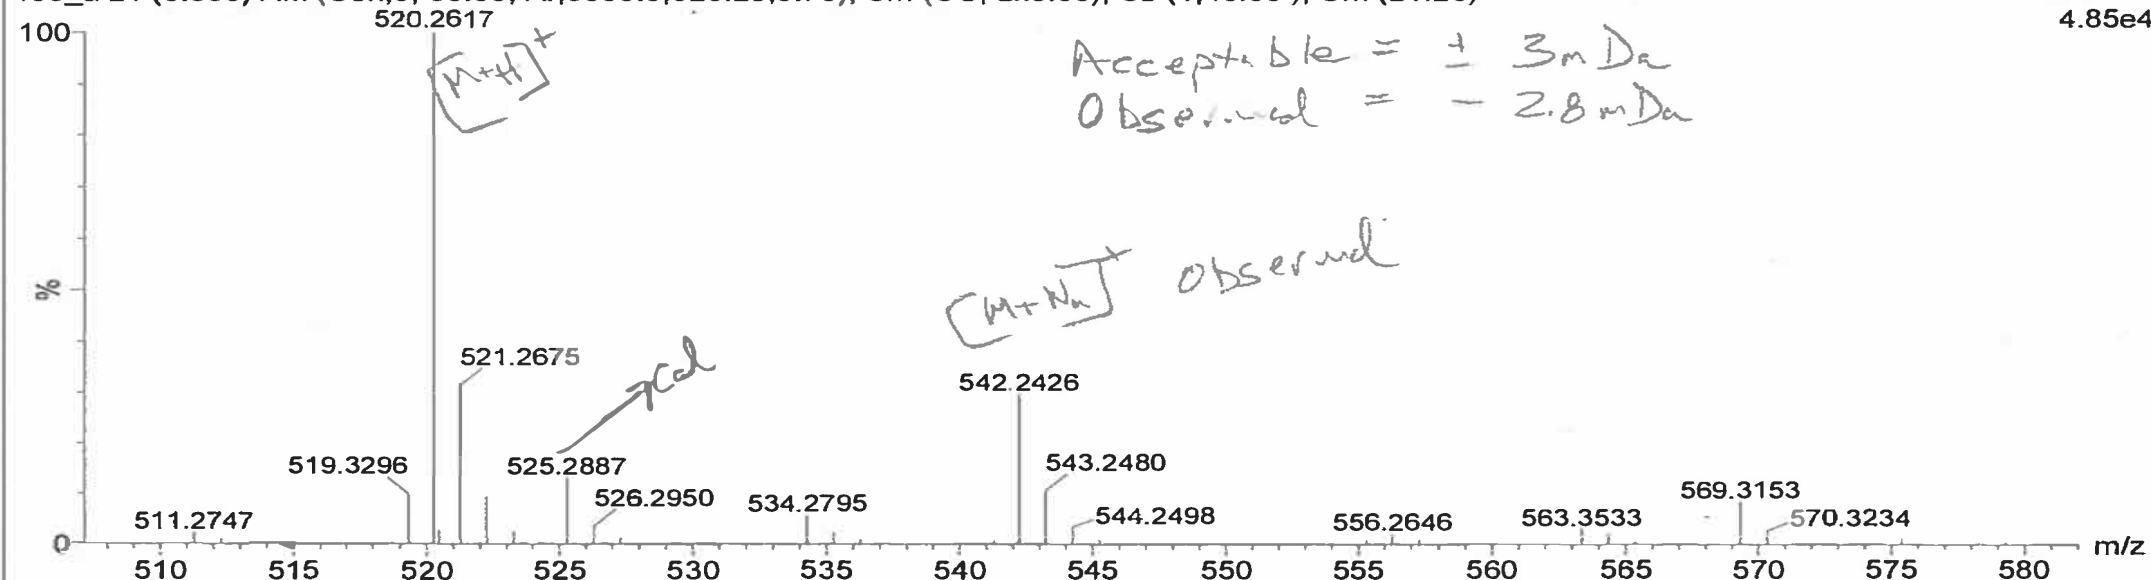

3145\_a (0.019) Is (1.00,0.01) C<sub>31</sub>H<sub>40</sub>N<sub>3</sub>O<sub>3</sub>S

TOF MS ES+  
6.58e12

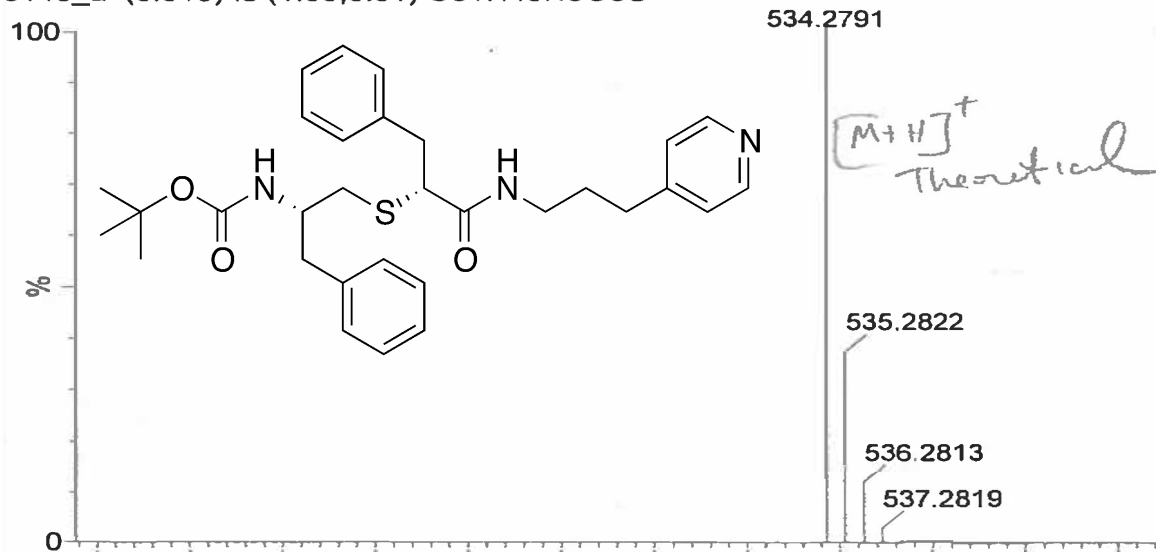

3145\_a 22 (0.403) AM (Cen,5, 80.00, Ar,8000.0,525.29,0.70); Sm (SG, 2x3.00); Sb (1,40.00 ); Cm (22:36)

TOF MS ES+  
3.90e4

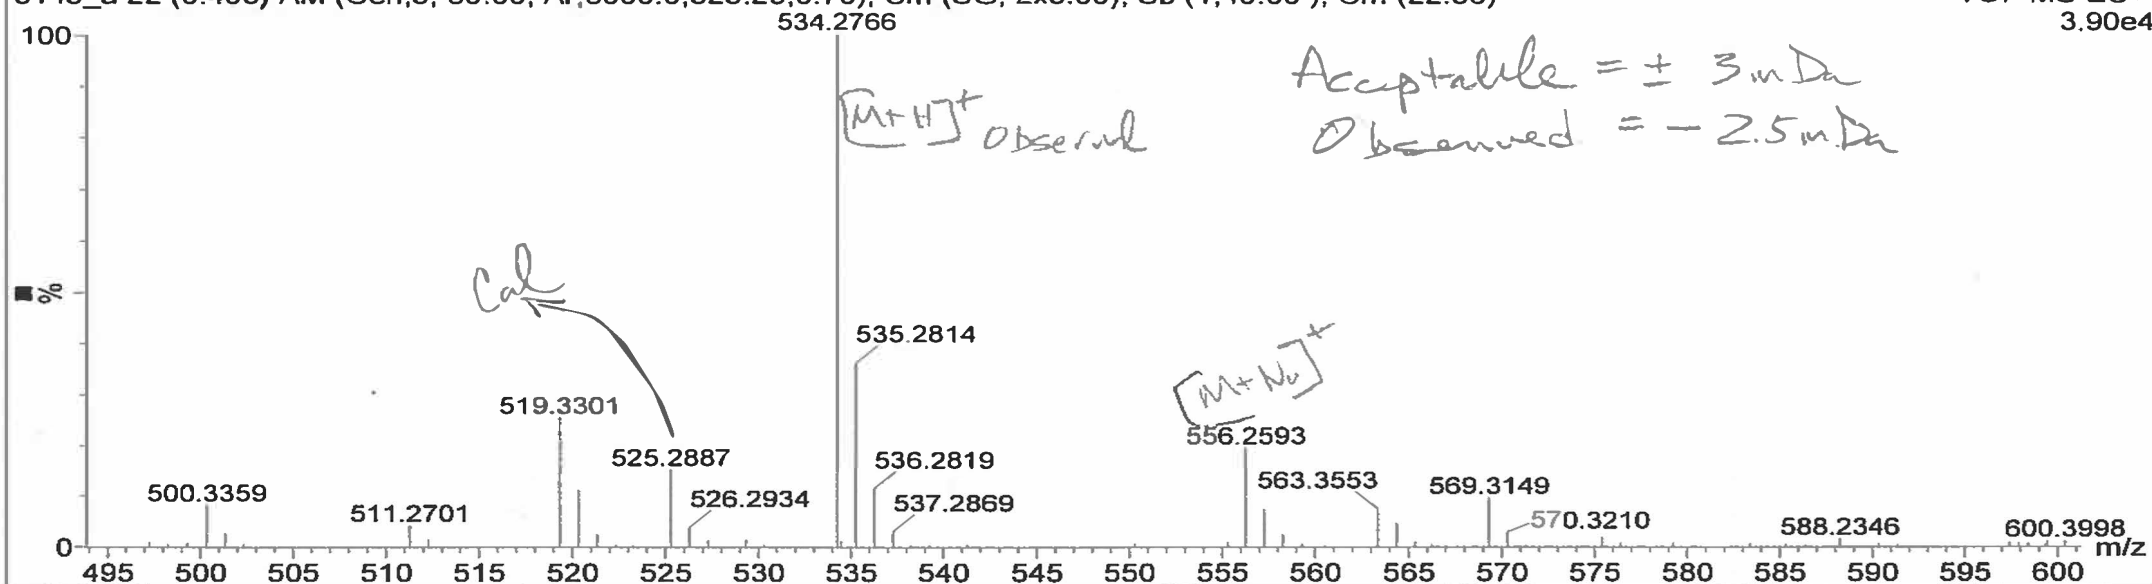



ES-365-b (0.019) Is (1.00,0.01) C<sub>31</sub>H<sub>32</sub>N<sub>4</sub>O<sub>2</sub>SNa  
547.2144

TOF MS ES+  
6.58e12

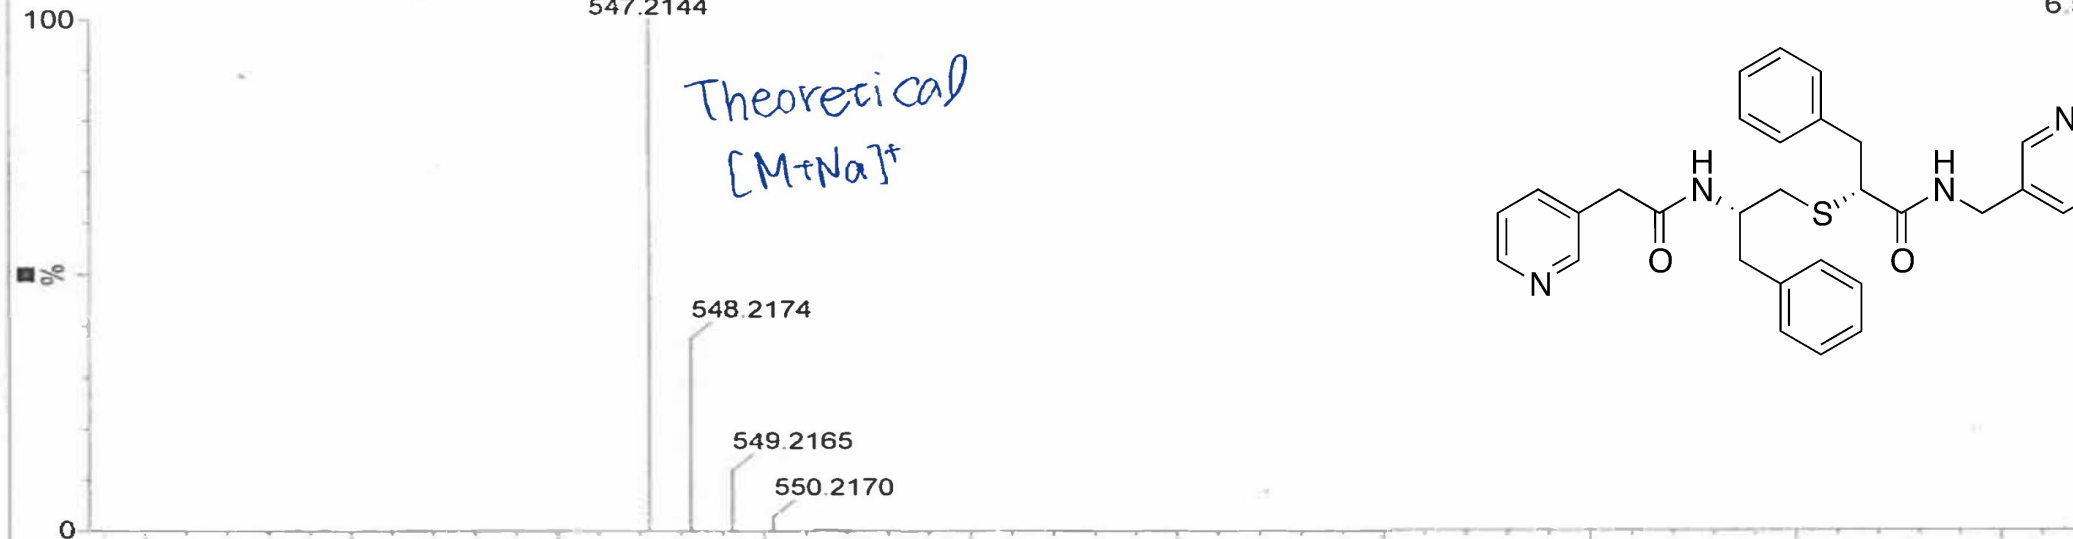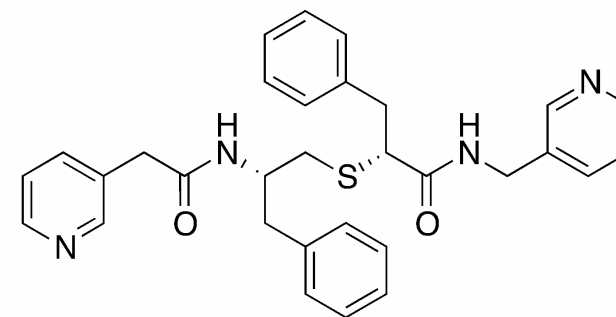

ES-365-b 17 (0.312) AM (Cen,5, 80.00, Ar,8000.0,569.31,0.70); Sm (SG, 2x3.00); Sb (1,40.00 )

TOF MS ES+  
1.86e3

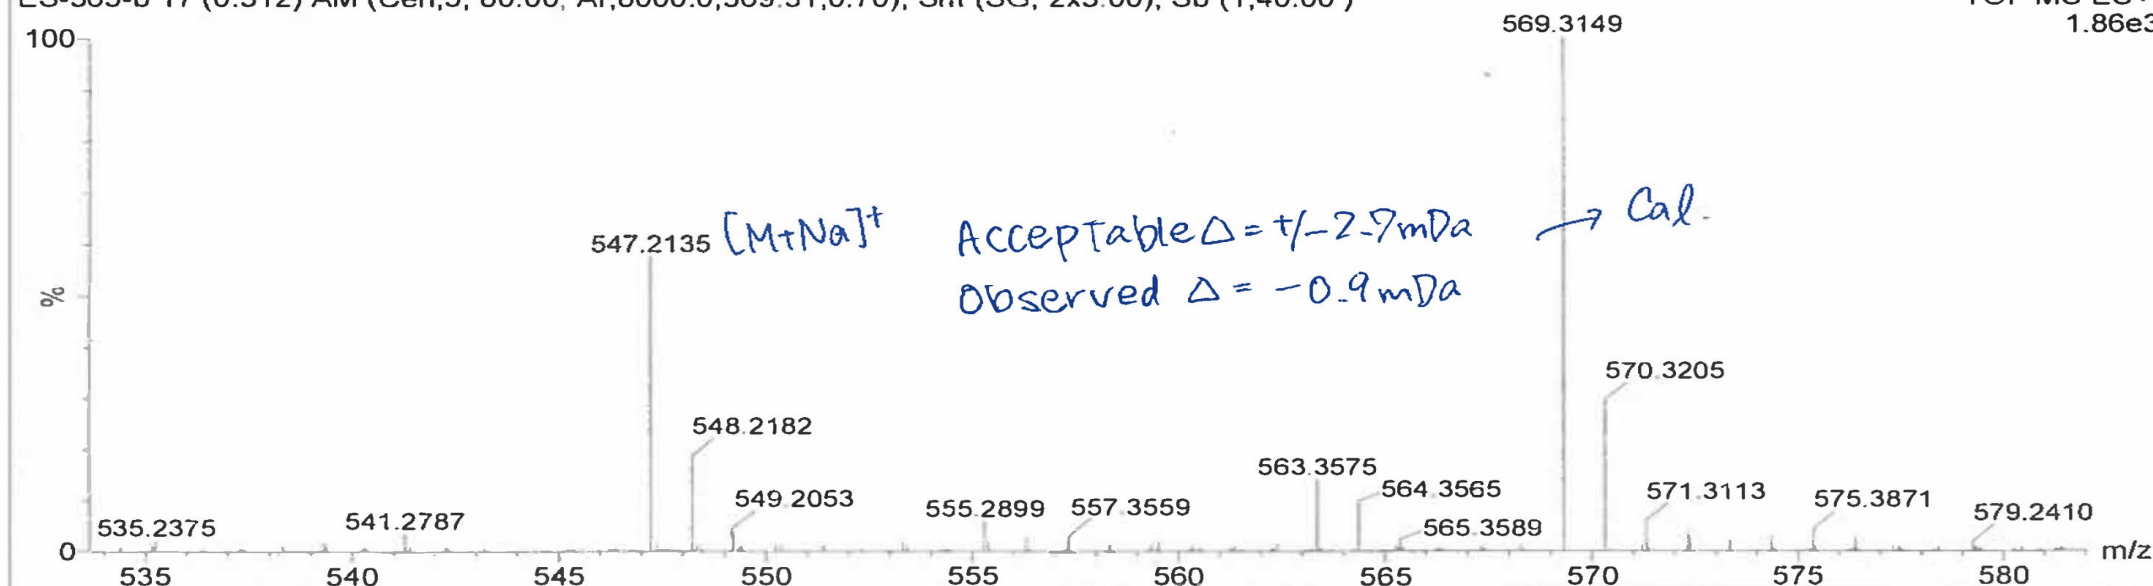

ES-374-a (0.019) Is (1.00,0.01) C<sub>33</sub>H<sub>36</sub>N<sub>4</sub>O<sub>2</sub>SNa

TOF MS ES+  
6.43e12

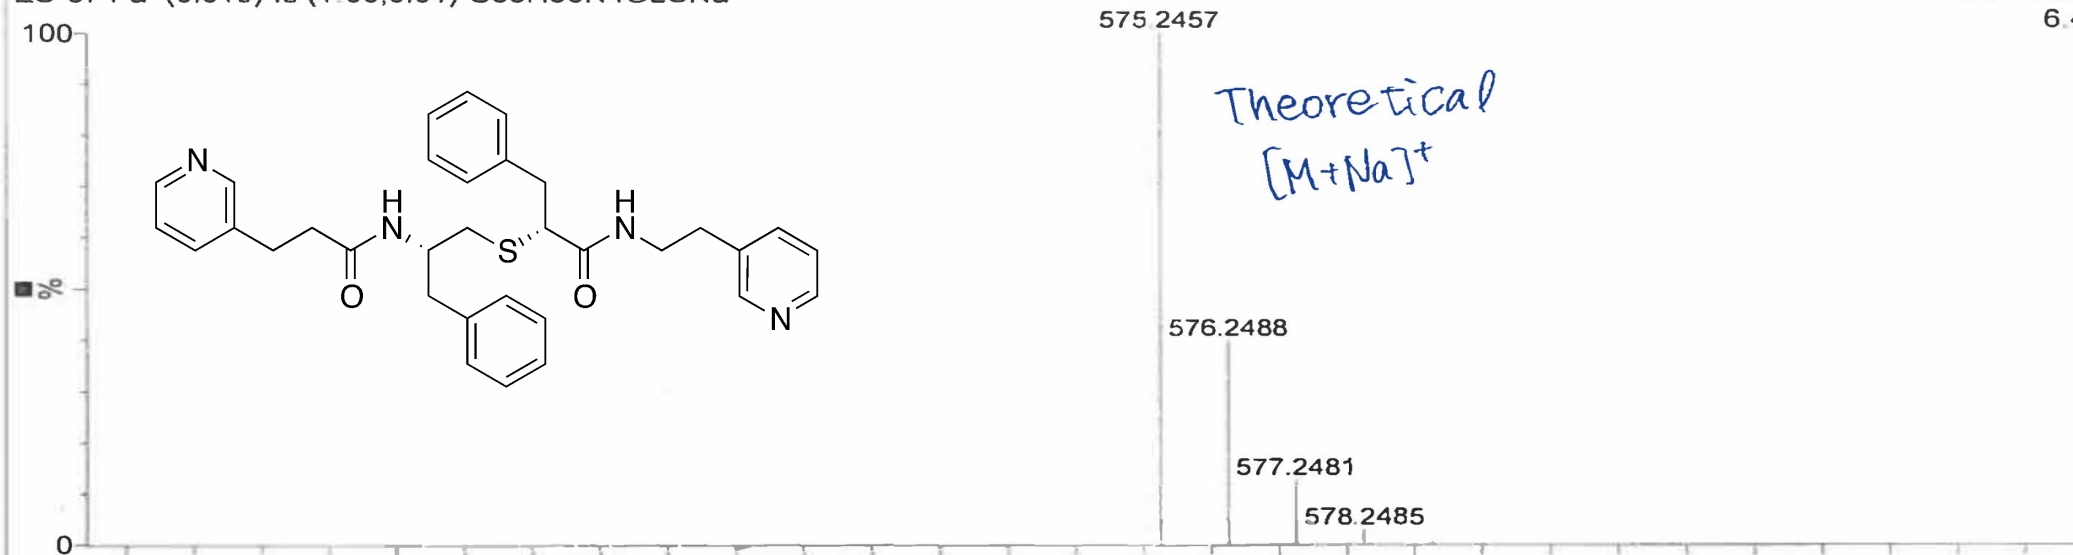

ES-374-a 21 (0.385) AM (Cen,5, 80.00, Ar,8000.0,569.31,0.70); Sm (SG, 2x3.00); Sb (1.40.00)

TOF MS ES+  
3.66e3

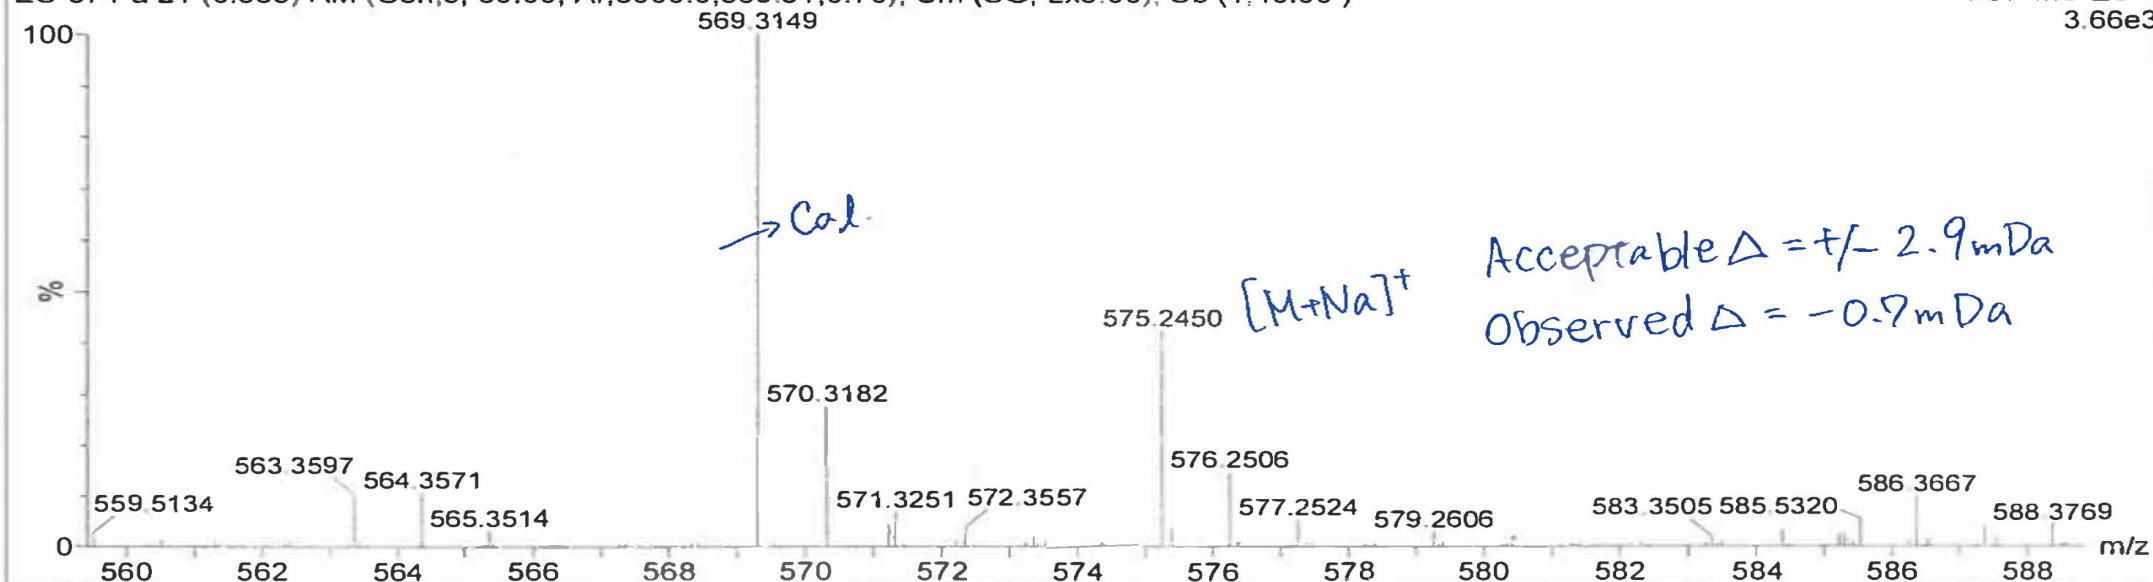

05ERS058HRMS (0.019) Is (1.00,0.01) C<sub>33</sub>H<sub>36</sub>N<sub>4</sub>O<sub>2</sub>SNa

TOF MS ES+  
6.43e12

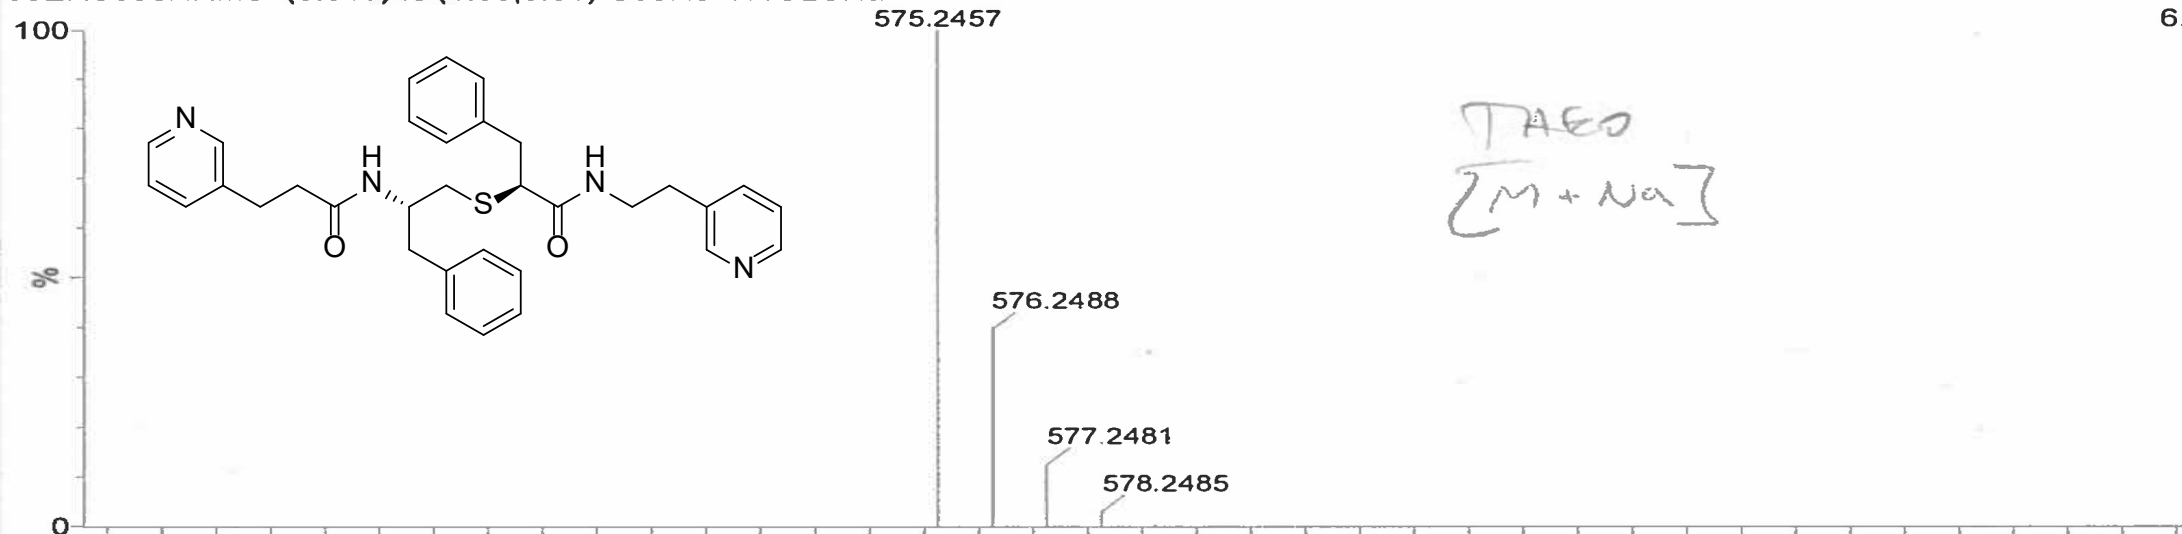

TAED  
[M+Na]

05ERS058HRMS 24 (0.440) AM (Cen,5, 80.00, Ar,8000.0,569.31,0.70); Sm (SG, 2x3.00); Sb (1,40.00)

TOF MS ES+  
2.01e4

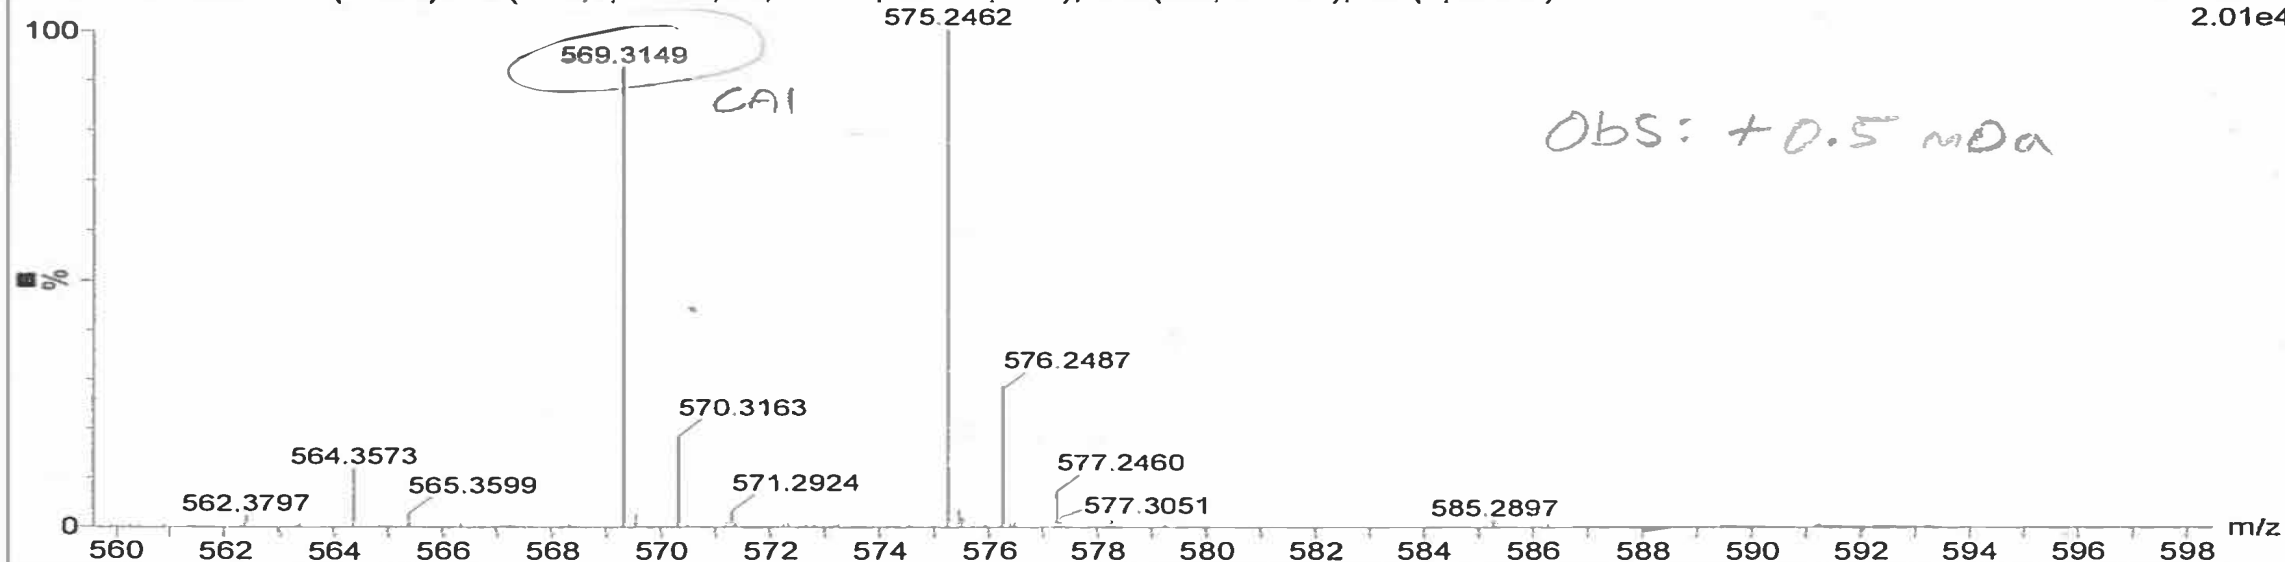

Obs: +0.5 mDa

3130\_a (0.019) Is (1.00,0.01) C<sub>32</sub>H<sub>34</sub>N<sub>4</sub>O<sub>2</sub>SNa

TOF MS ES+  
6.51e12

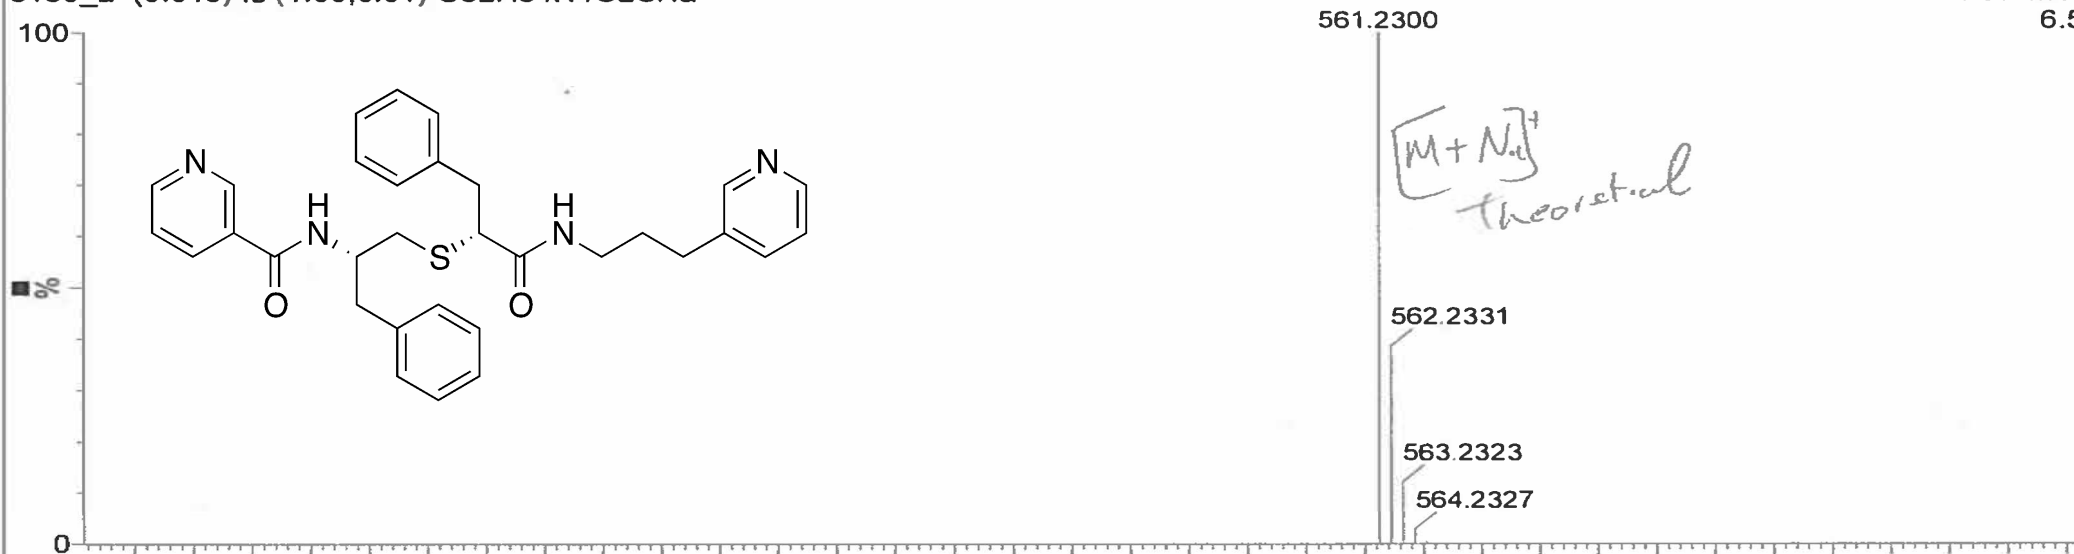

3130\_a 18 (0.330) AM (Cen,5, 80.00, Ar,8000.0,525.29,0.70); Sm (SG, 2x3.00); Sb (1,40.00 ); Cm (15:26)

TOF MS ES+  
1.95e4

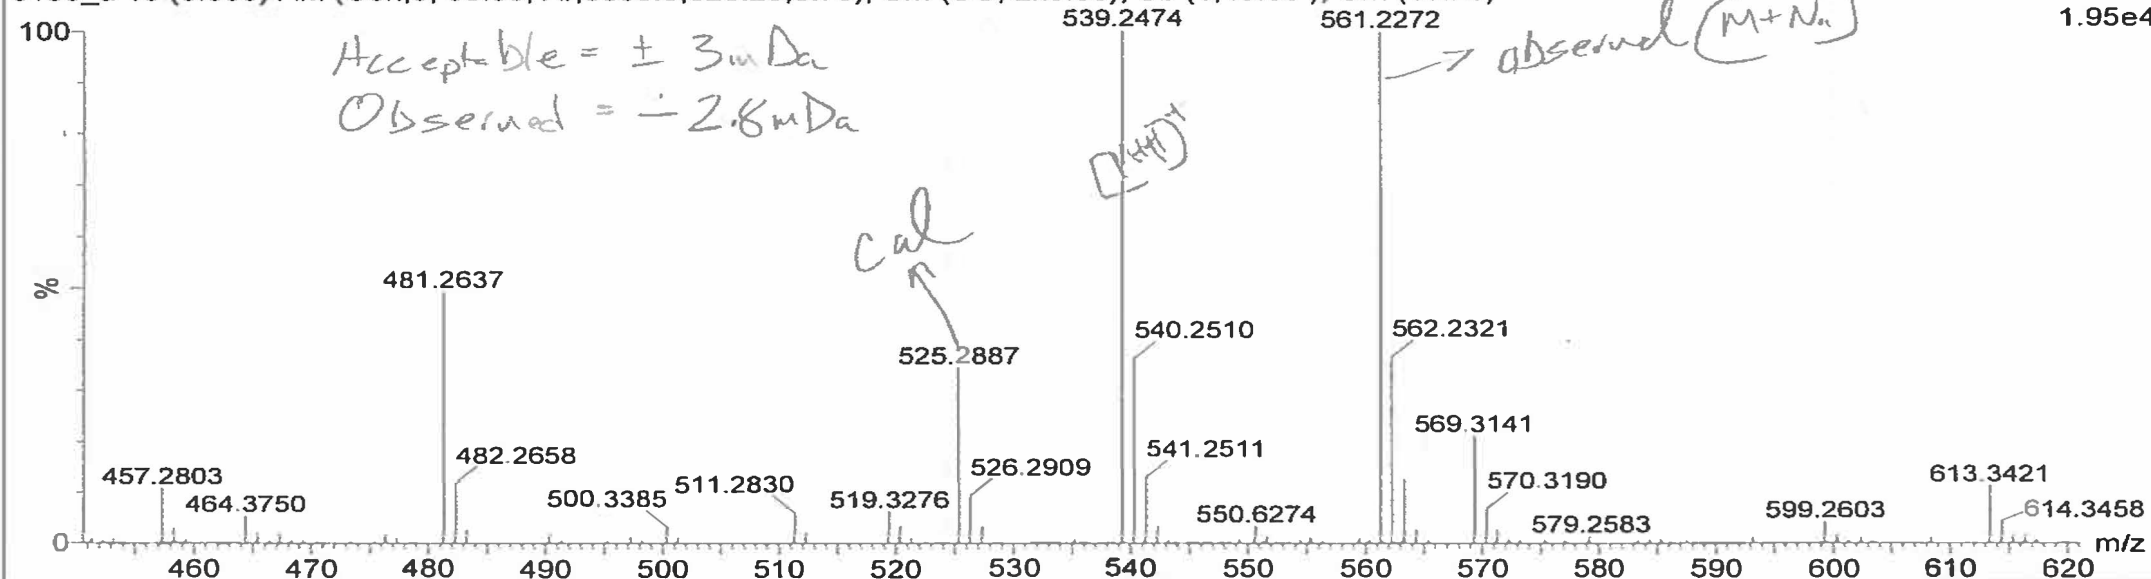

3138\_a (0.019) Is (1.00,0.01) C<sub>34</sub>H<sub>38</sub>N<sub>5</sub>O<sub>3</sub>S

TOF MS ES+  
6.32e12

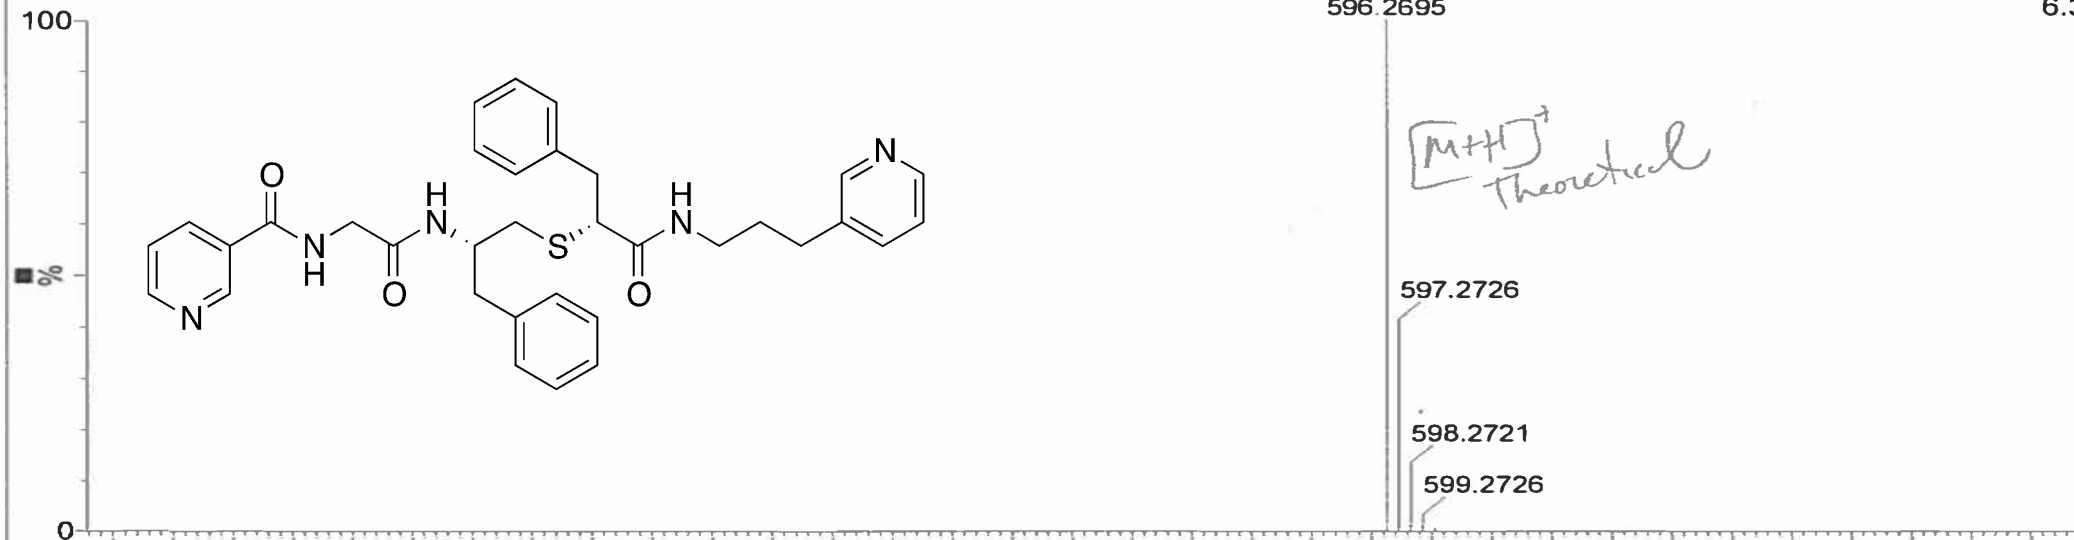

3138\_a 24 (0.440) AM (Cen,5, 80.00, Ar,8000.0,525.29,0.70); Sm (SG, 2x3.00); Sb (1,40.00 ); Cm (11:36)

TOF MS ES+  
3.08e4

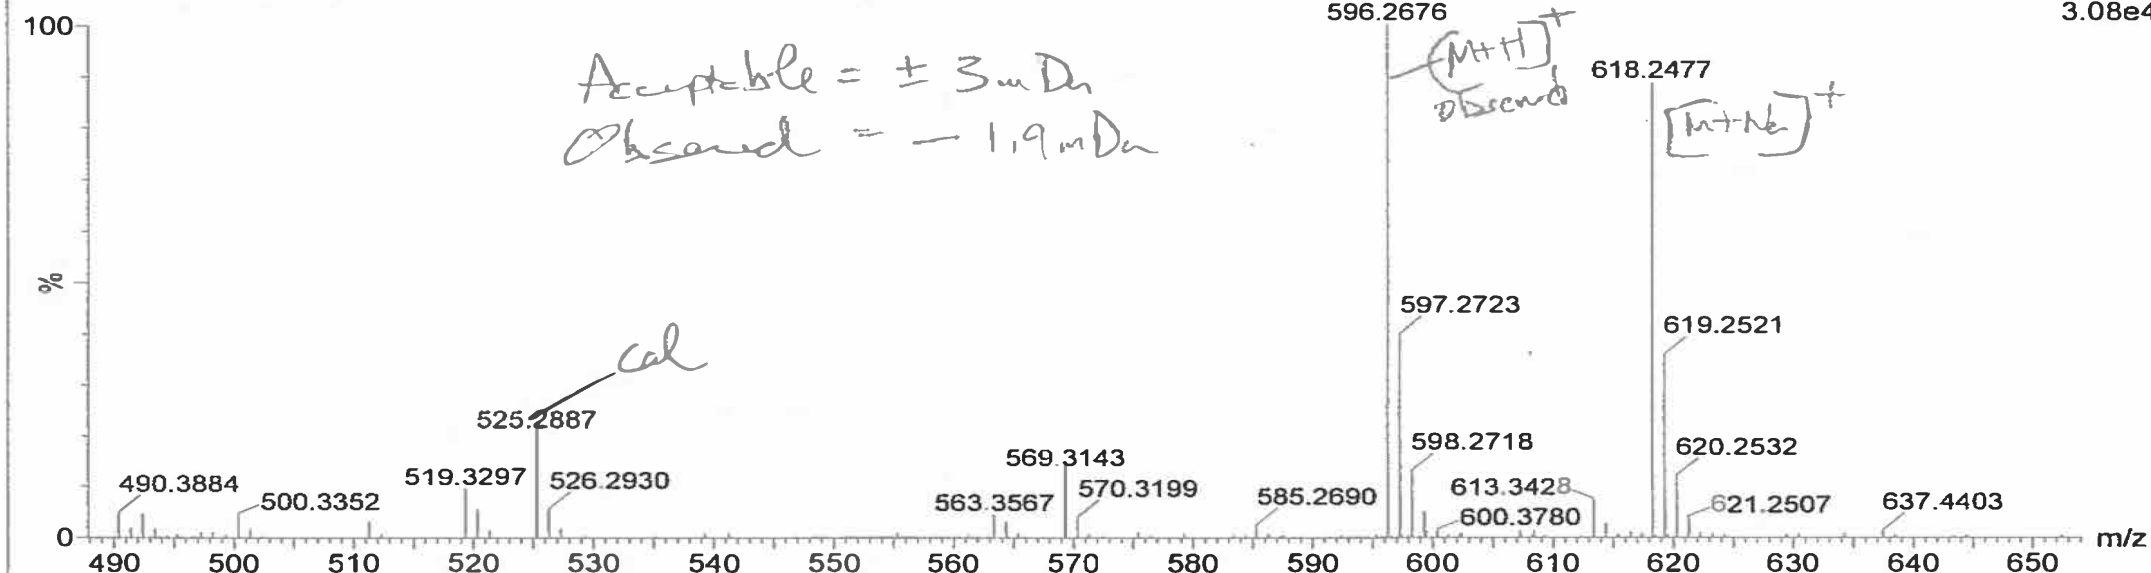

<sup>1</sup>H spectrum

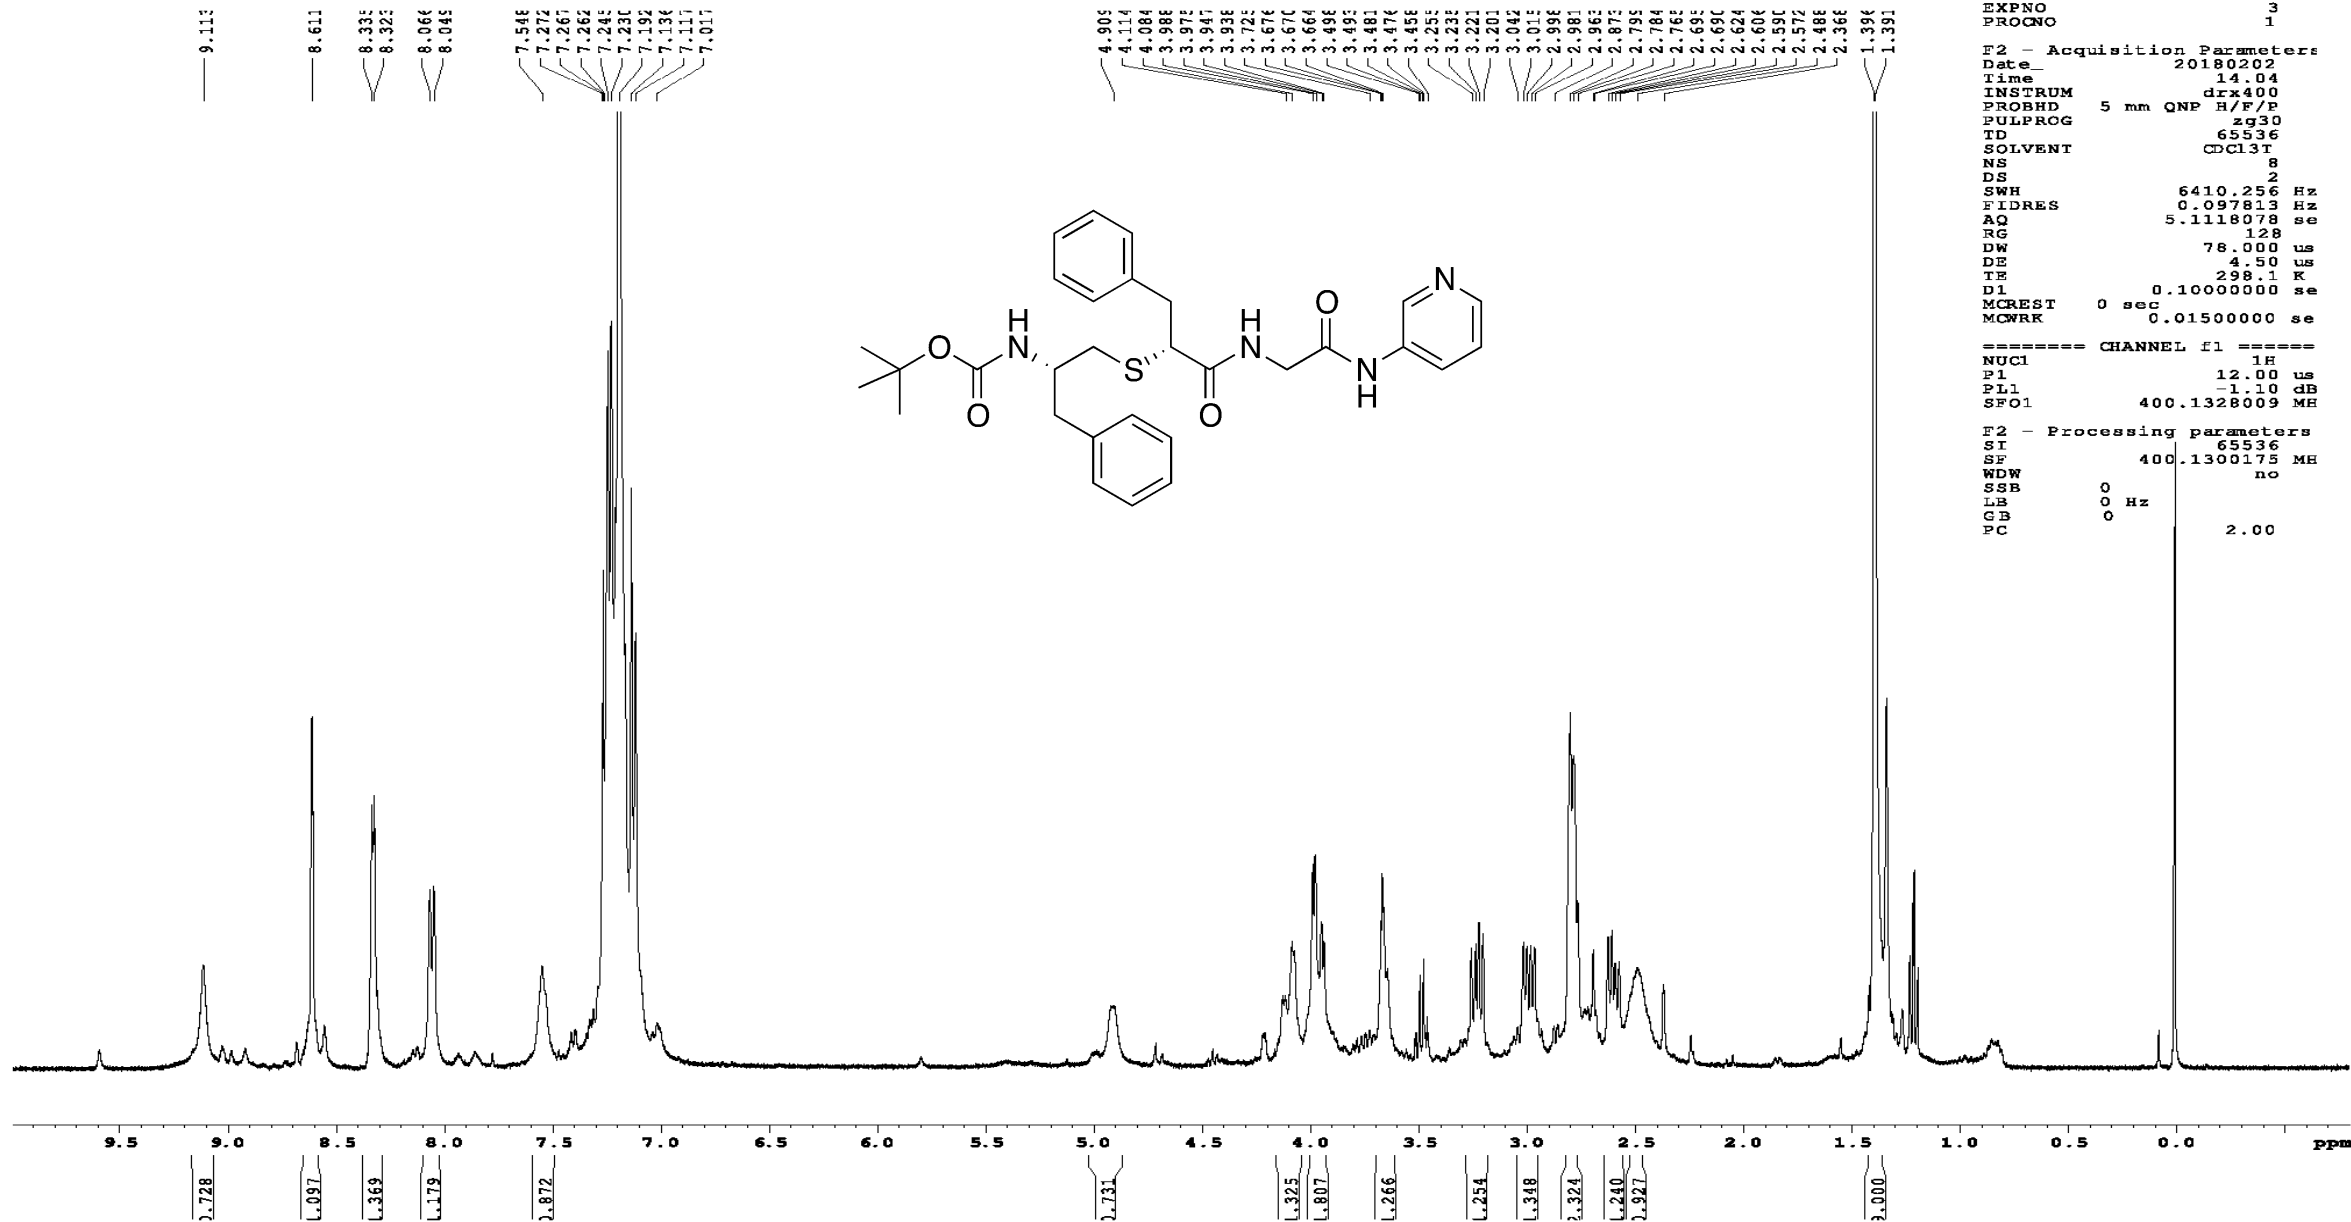

Current Data Parameters

NAME 03ERS124  
EXPNO 3  
PROCNO 1

F2 - Acquisition Parameters

Date\_ 20180202  
Time 14.04  
INSTRUM drx400  
PROBHD 5 mm QNP H/F/P  
PULPROG zg30  
TD 65536  
SOLVENT CDCl3T  
NS 8  
DS 2  
SWH 6410.256 Hz  
FIDRES 0.097813 Hz  
AQ 5.1118078 se  
RG 128  
DW 78.000 us  
DE 4.50 us  
TE 298.1 K  
D1 0.10000000 se  
MCREST 0 sec  
MCWRK 0.01500000 se

===== CHANNEL f1 =====

NUC1 1H  
P1 12.00 us  
PL1 -1.10 dB  
SFO1 400.1328009 MHz

F2 - Processing parameters

SI 65536  
SF 400.1300175 MHz  
WDW no  
SSB 0  
LB 0 Hz  
GB 0  
PC 2.00

1H spectrum

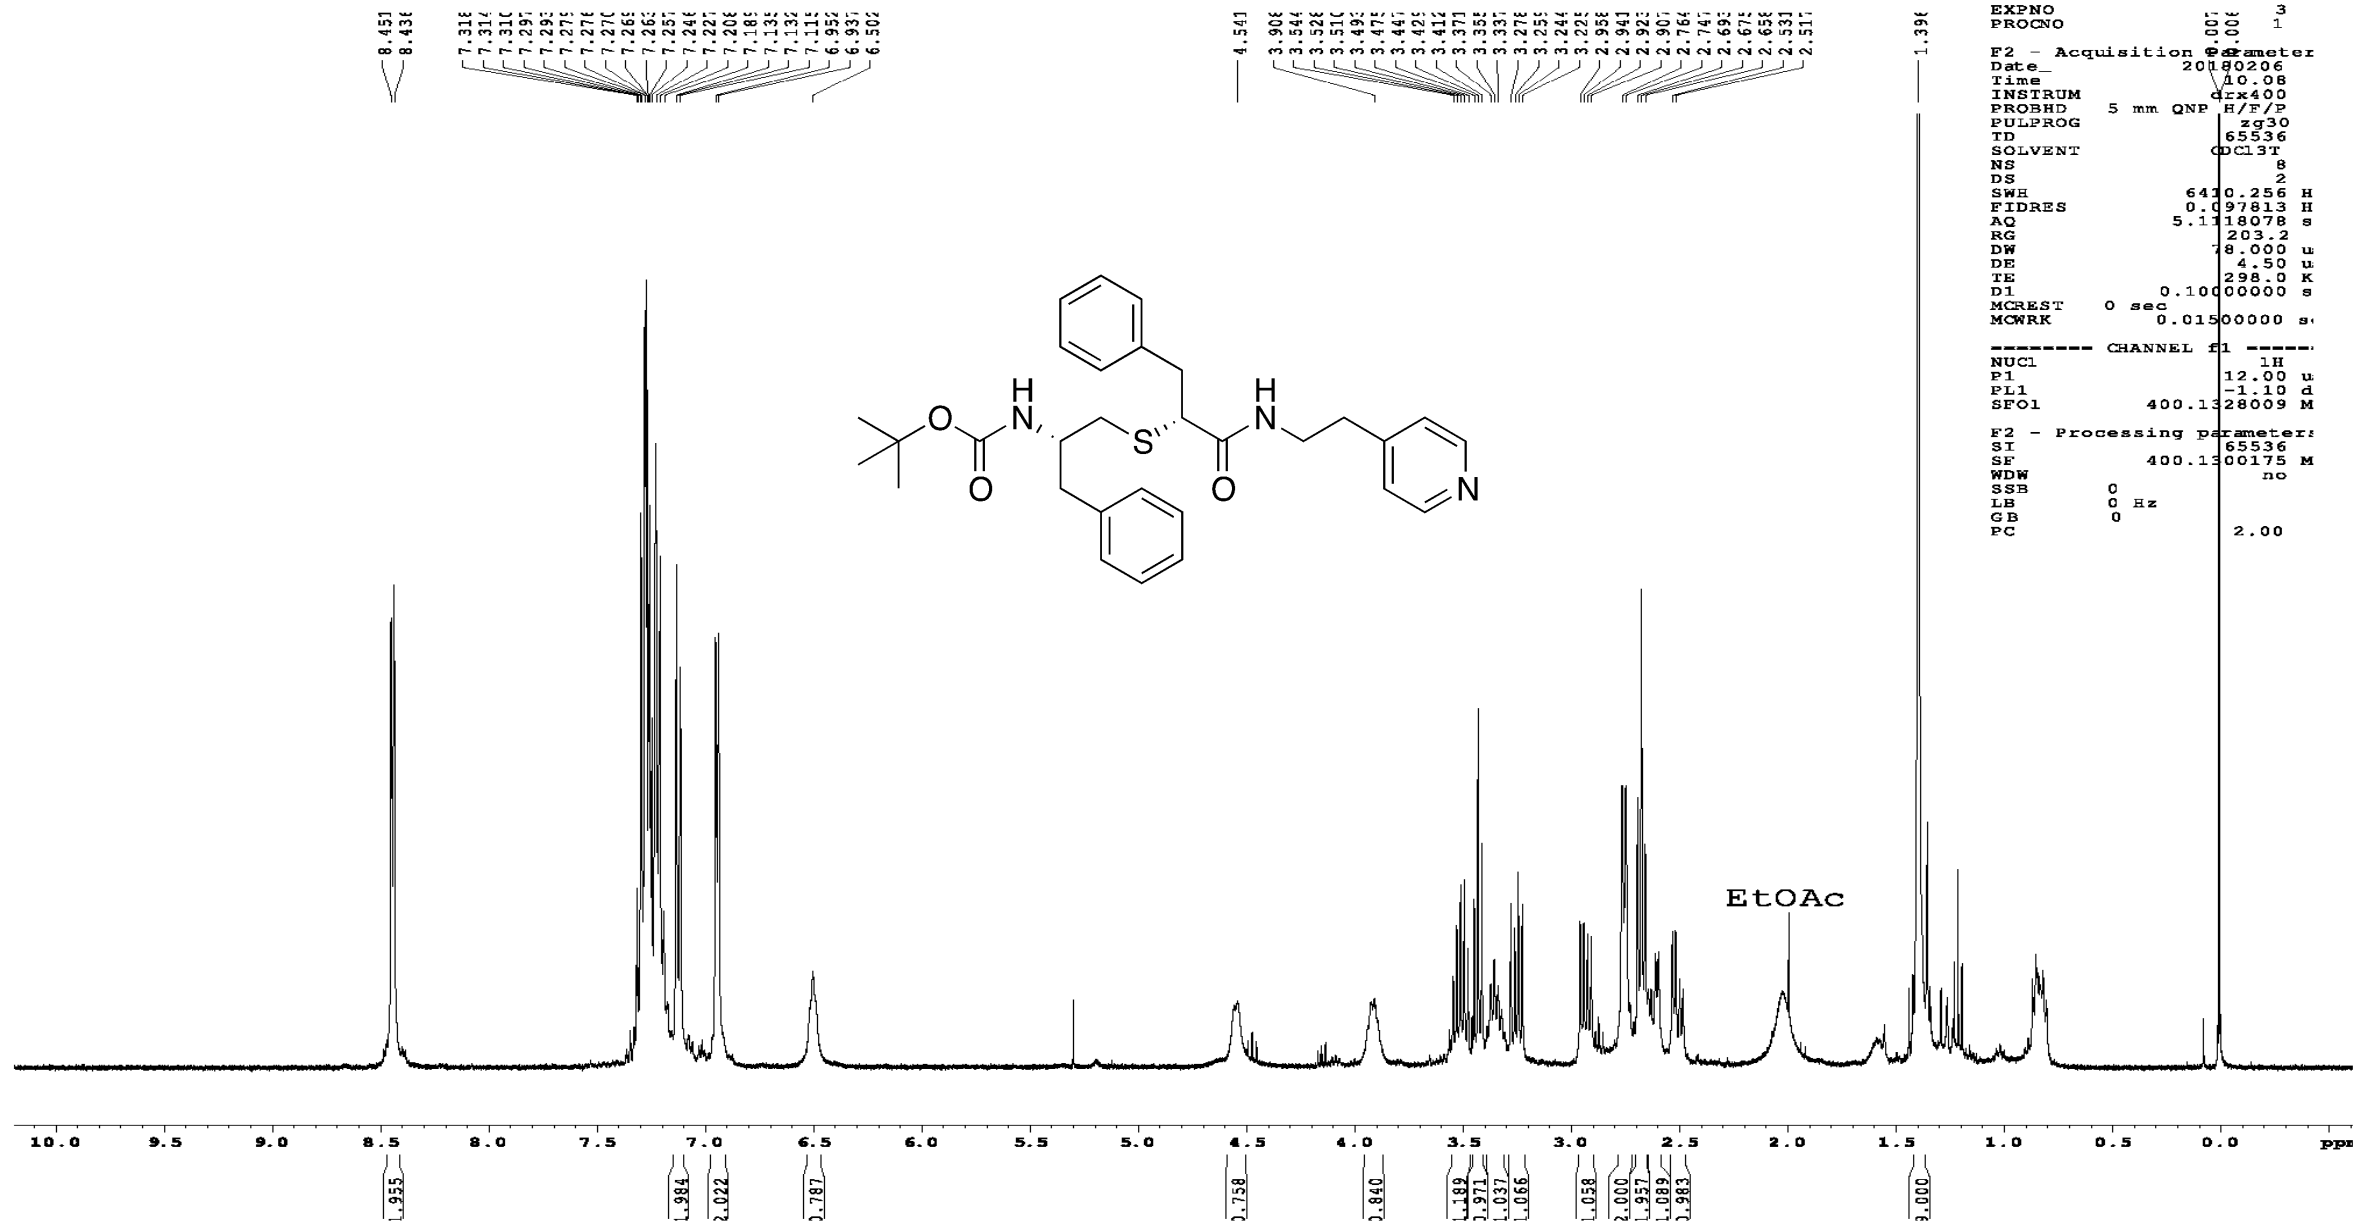

Current Data Parameters  
NAME 04ERS008  
EXPNO 3  
PROCNO 1  
F2 - Acquisition Parameters  
Date\_ 20180206  
Time 10.08  
INSTRUM dx400  
PROBHD 5 mm QNP H/P  
PULPROG zgpg30  
TD 65536  
SOLVENT CDCl3  
NS 8  
DS 2  
SWH 6410.256 H  
FIDRES 0.097813 H  
AQ 5.1118078 s  
RG 203.2  
DW 78.000 u  
DE 4.50 u  
TE 298.0 K  
D1 0.1000000 s  
MCREST 0 sec  
MCWRK 0.01500000 s  
----- CHANNEL f1 -----  
NUC1 1H  
P1 12.00 u  
PL1 -1.10 d  
SFO1 400.1328009 M  
F2 - Processing parameters:  
SI 65536  
SF 400.1300175 M  
WDW no  
SSB 0  
LB 0 Hz  
GB 0  
PC 2.00

1H spectrum

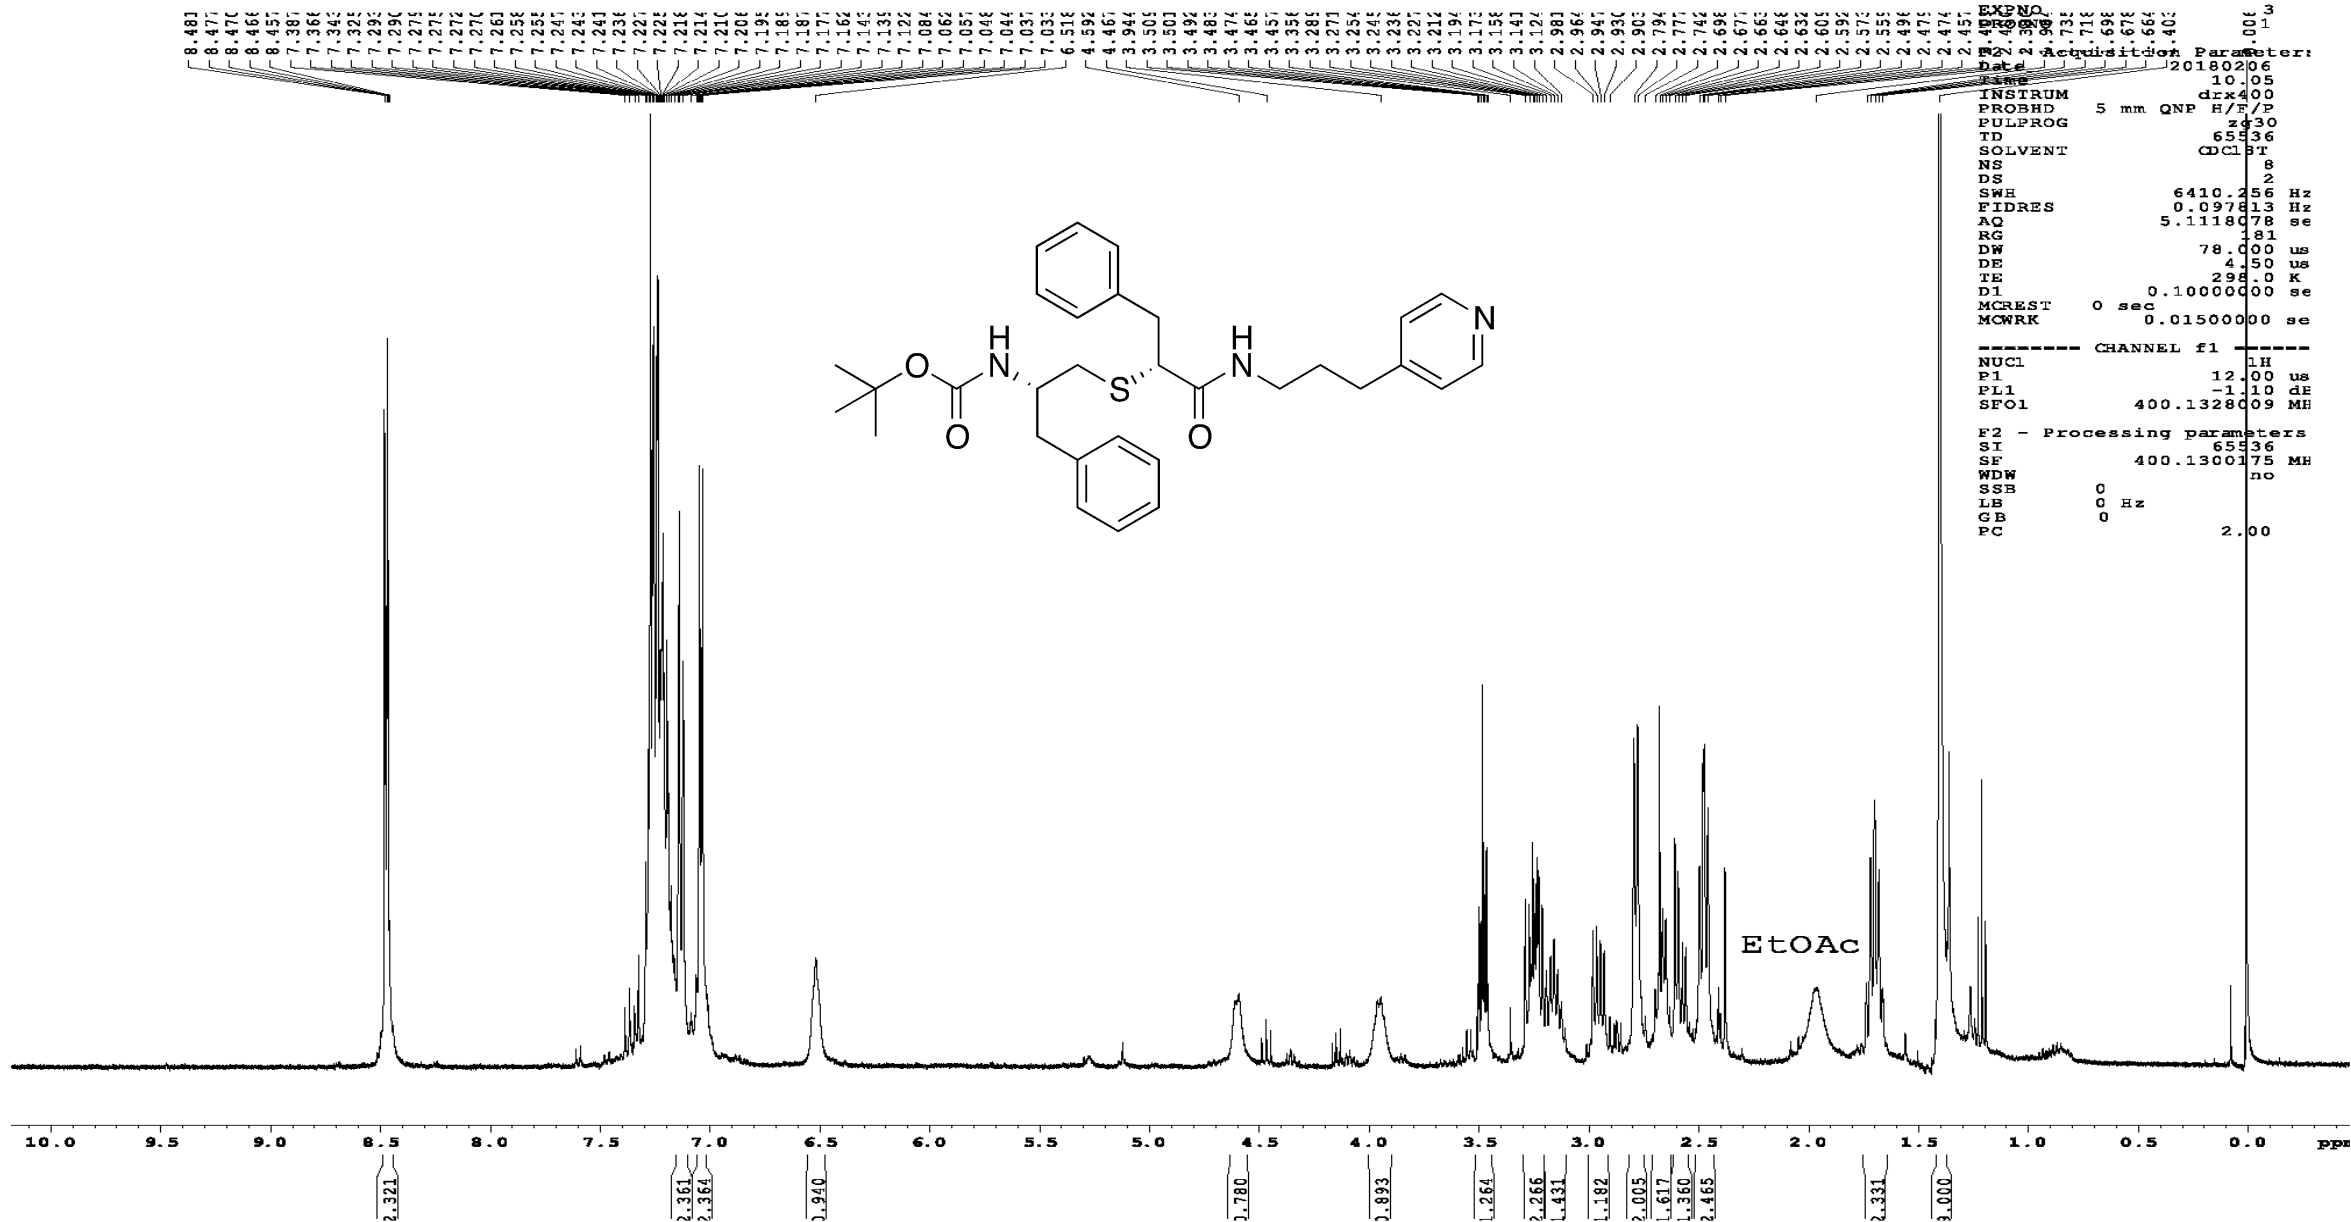

Current Data Parameters  
NAME 03ERS145  
EXPNO 1  
PROCNO 1  
Date\_ 20180206  
Time 10.05  
INSTRUM dxx400  
PROBHD 5 mm QNP H/F/3  
PULPROG zgpg30  
TD 65536  
SOLVENT CDCl3  
NS 8  
DS 2  
SWH 6410.256 Hz  
FIDRES 0.097613 Hz  
AQ 5.1118078 se  
RG 381  
DW 78.000 us  
DE 4.50 us  
TE 298.0 K  
D1 0.10000000 se  
MCREST 0 sec  
MCWRK 0.01500000 se

----- CHANNEL f1 -----  
NUC1 1H  
P1 12.00 us  
PL1 -1.10 dB  
SFO1 400.132809 MHz

F2 - Processing parameters  
SI 65536  
SF 400.1300175 MHz  
WDW no  
SSB 0  
LB 0 Hz  
GB 0  
PC 2.00



<sup>1</sup>H spectrum

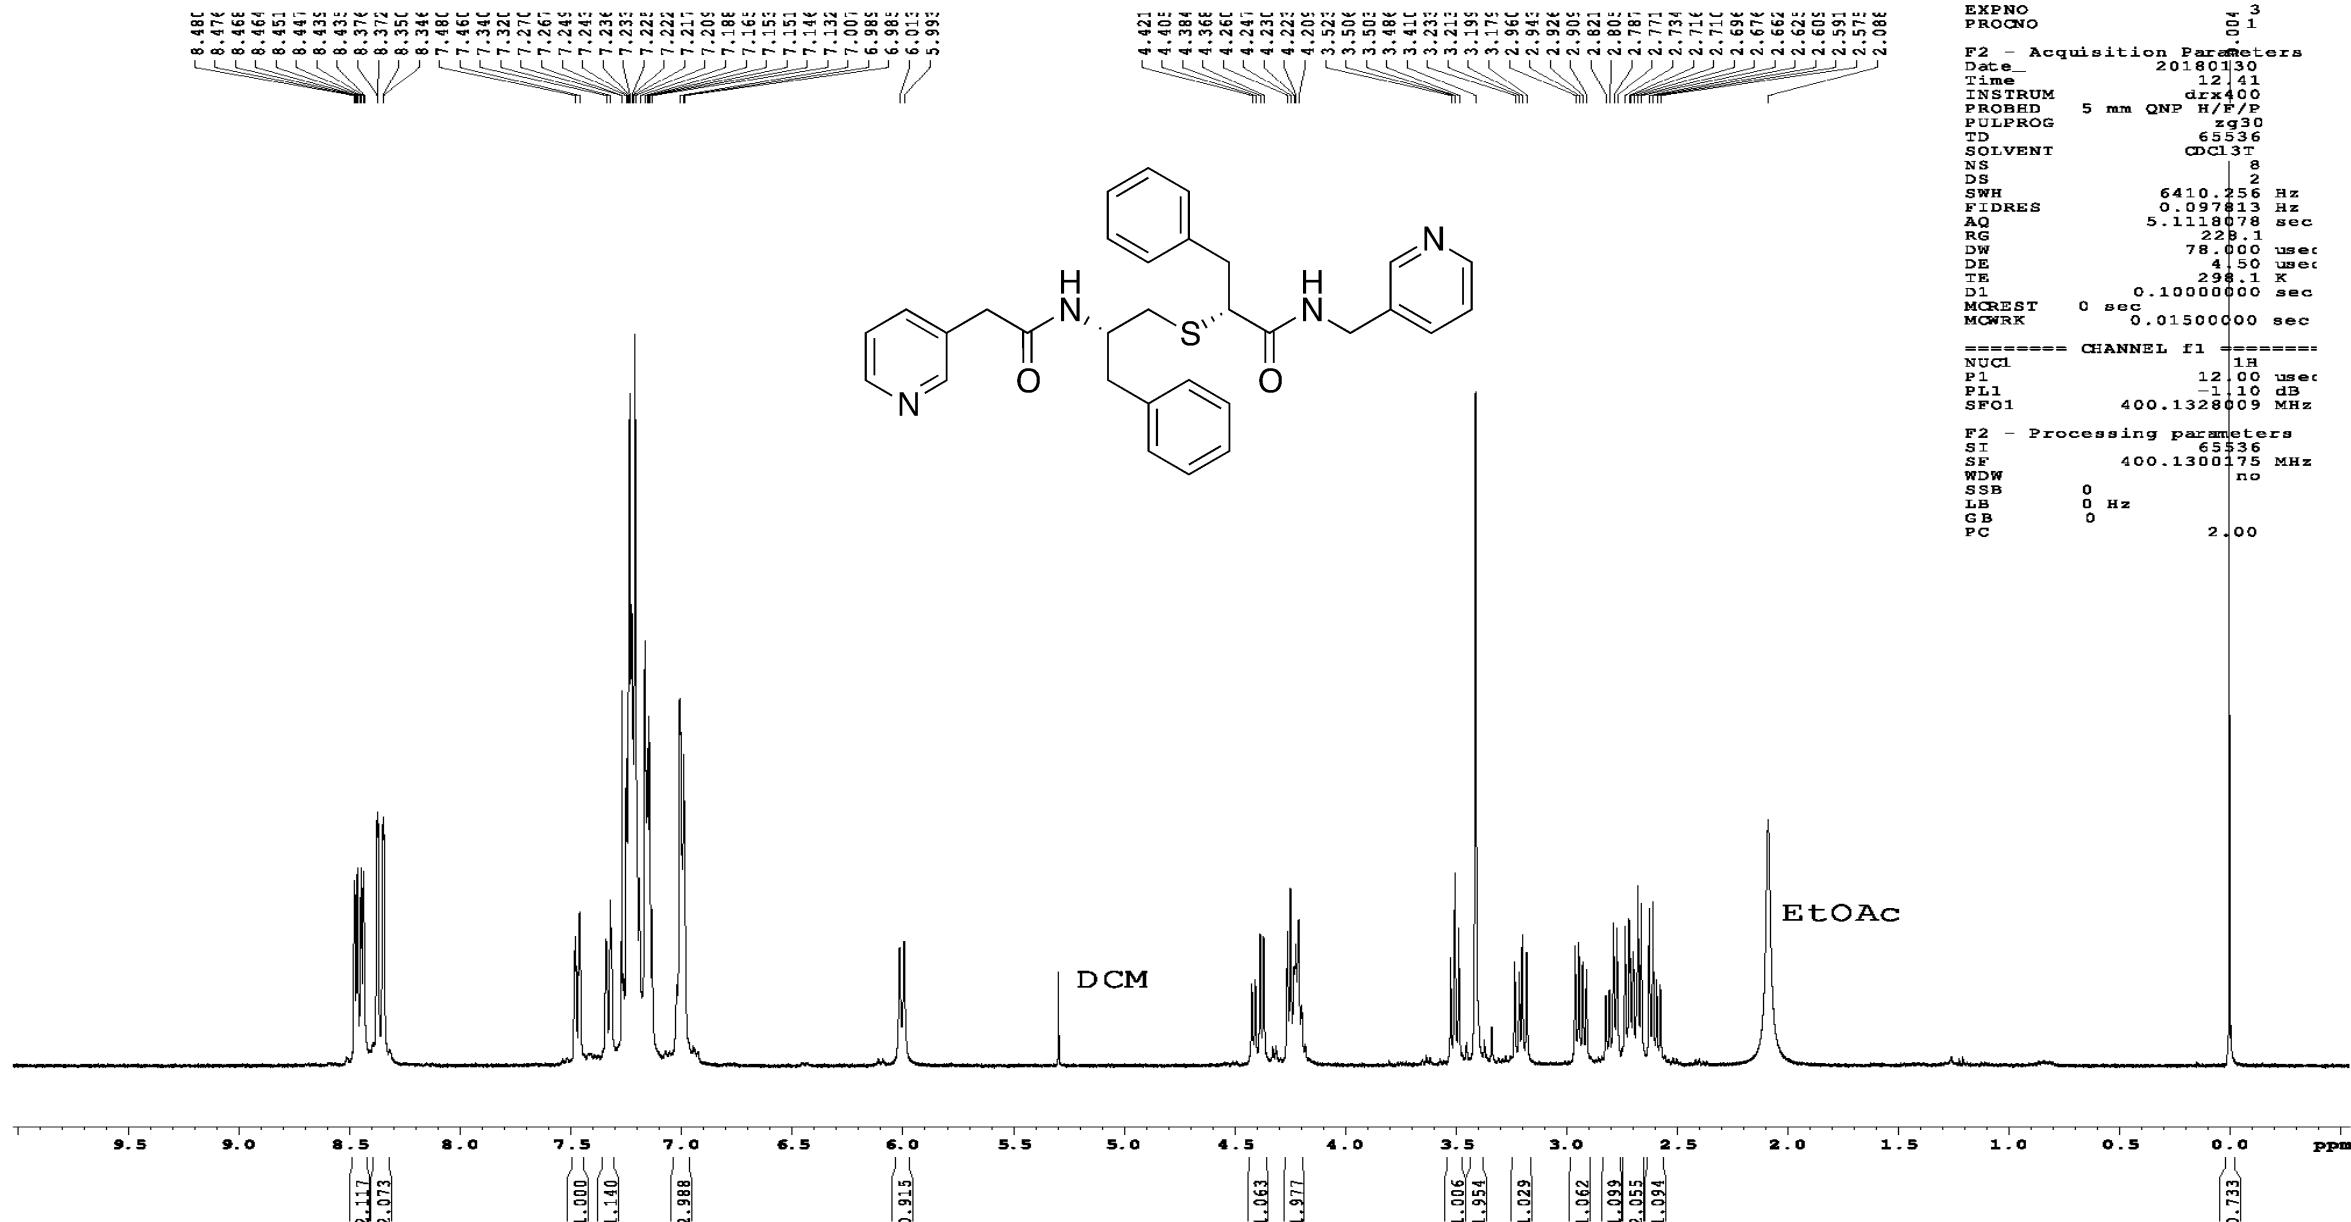

Current Data Parameters  
NAME 03ERS065  
EXPNO 3  
PROCNO 01  
F2 - Acquisition Parameters  
Date\_ 20180130  
Time 12.41  
INSTRUM drx400  
PROBHD 5 mm QNP H/F/P  
PULPROG zgpg30  
TD 65536  
SOLVENT CDCl3T  
NS 8  
DS 2  
SWH 6410.256 Hz  
FIDRES 0.097813 Hz  
AQ 5.1118078 sec  
RG 228.1  
DW 78.000 usec  
DE 4.50 usec  
TE 298.1 K  
D1 0.10000000 sec  
MCREST 0 sec  
MCWRK 0.01500000 sec  
===== CHANNEL f1 =====  
NUC1 <sup>1</sup>H  
P1 12.00 usec  
PL1 -1.10 dB  
SFO1 400.1328009 MHz  
F2 - Processing parameters  
SI 65536  
SF 400.1300175 MHz  
WDW no  
SSB 0  
LB 0 Hz  
GB 0  
PC 2.00

<sup>1</sup>H spectrum

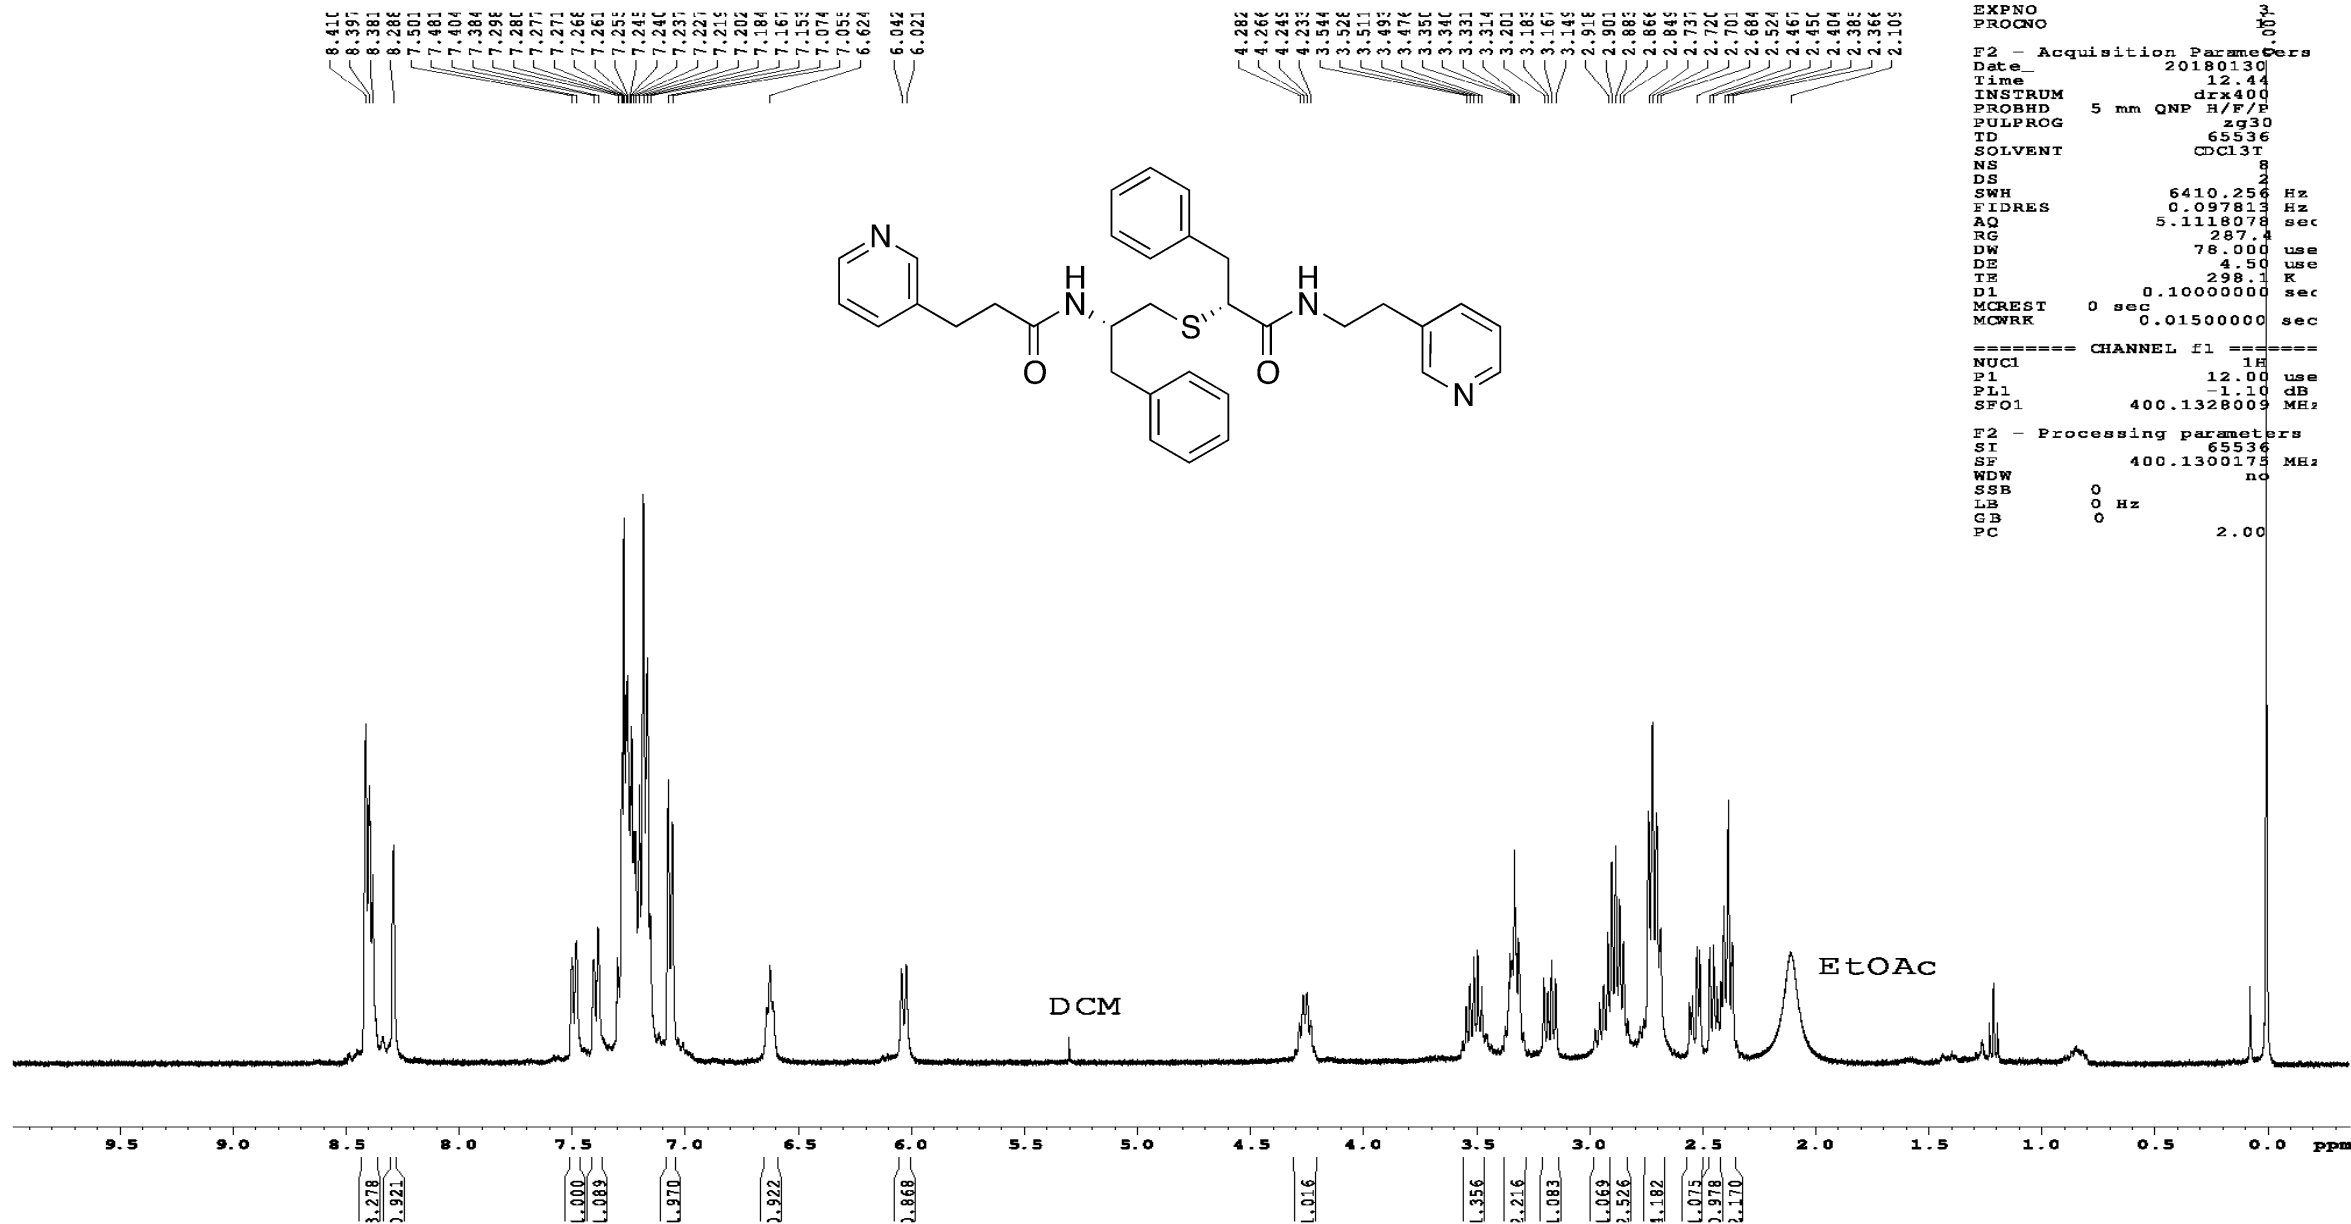

```

Current Data Parameters
NAME          03ERS074
EXPNO         3
PROCNO        10
F2 - Acquisition Parameters
Date_         20180130
Time          12.44
INSTRUM       drx400
PROBHD        5 mm QNP H/F/
PULPROG       zg30
TD            65536
SOLVENT       CDCl3
NS            8
DS            2
SWH           6410.256 Hz
FIDRES        0.097813 Hz
AQ            5.1118078 sec
RG            287.4
DW            76.000 use
DE            4.50 use
TE            298.1 K
D1            0.10000000 sec
MCREST        0 sec
MOWRK         0.01500000 sec

===== CHANNEL f1 =====
NUC1           1H
P1            12.00 use
PL1           -1.10 dB
SFO1          400.1328009 MHz

F2 - Processing parameters
SI            65536
SF            400.1300175 MHz
WDW           no
SSB           0
LB            0 Hz
GB            0
PC            2.00
  
```

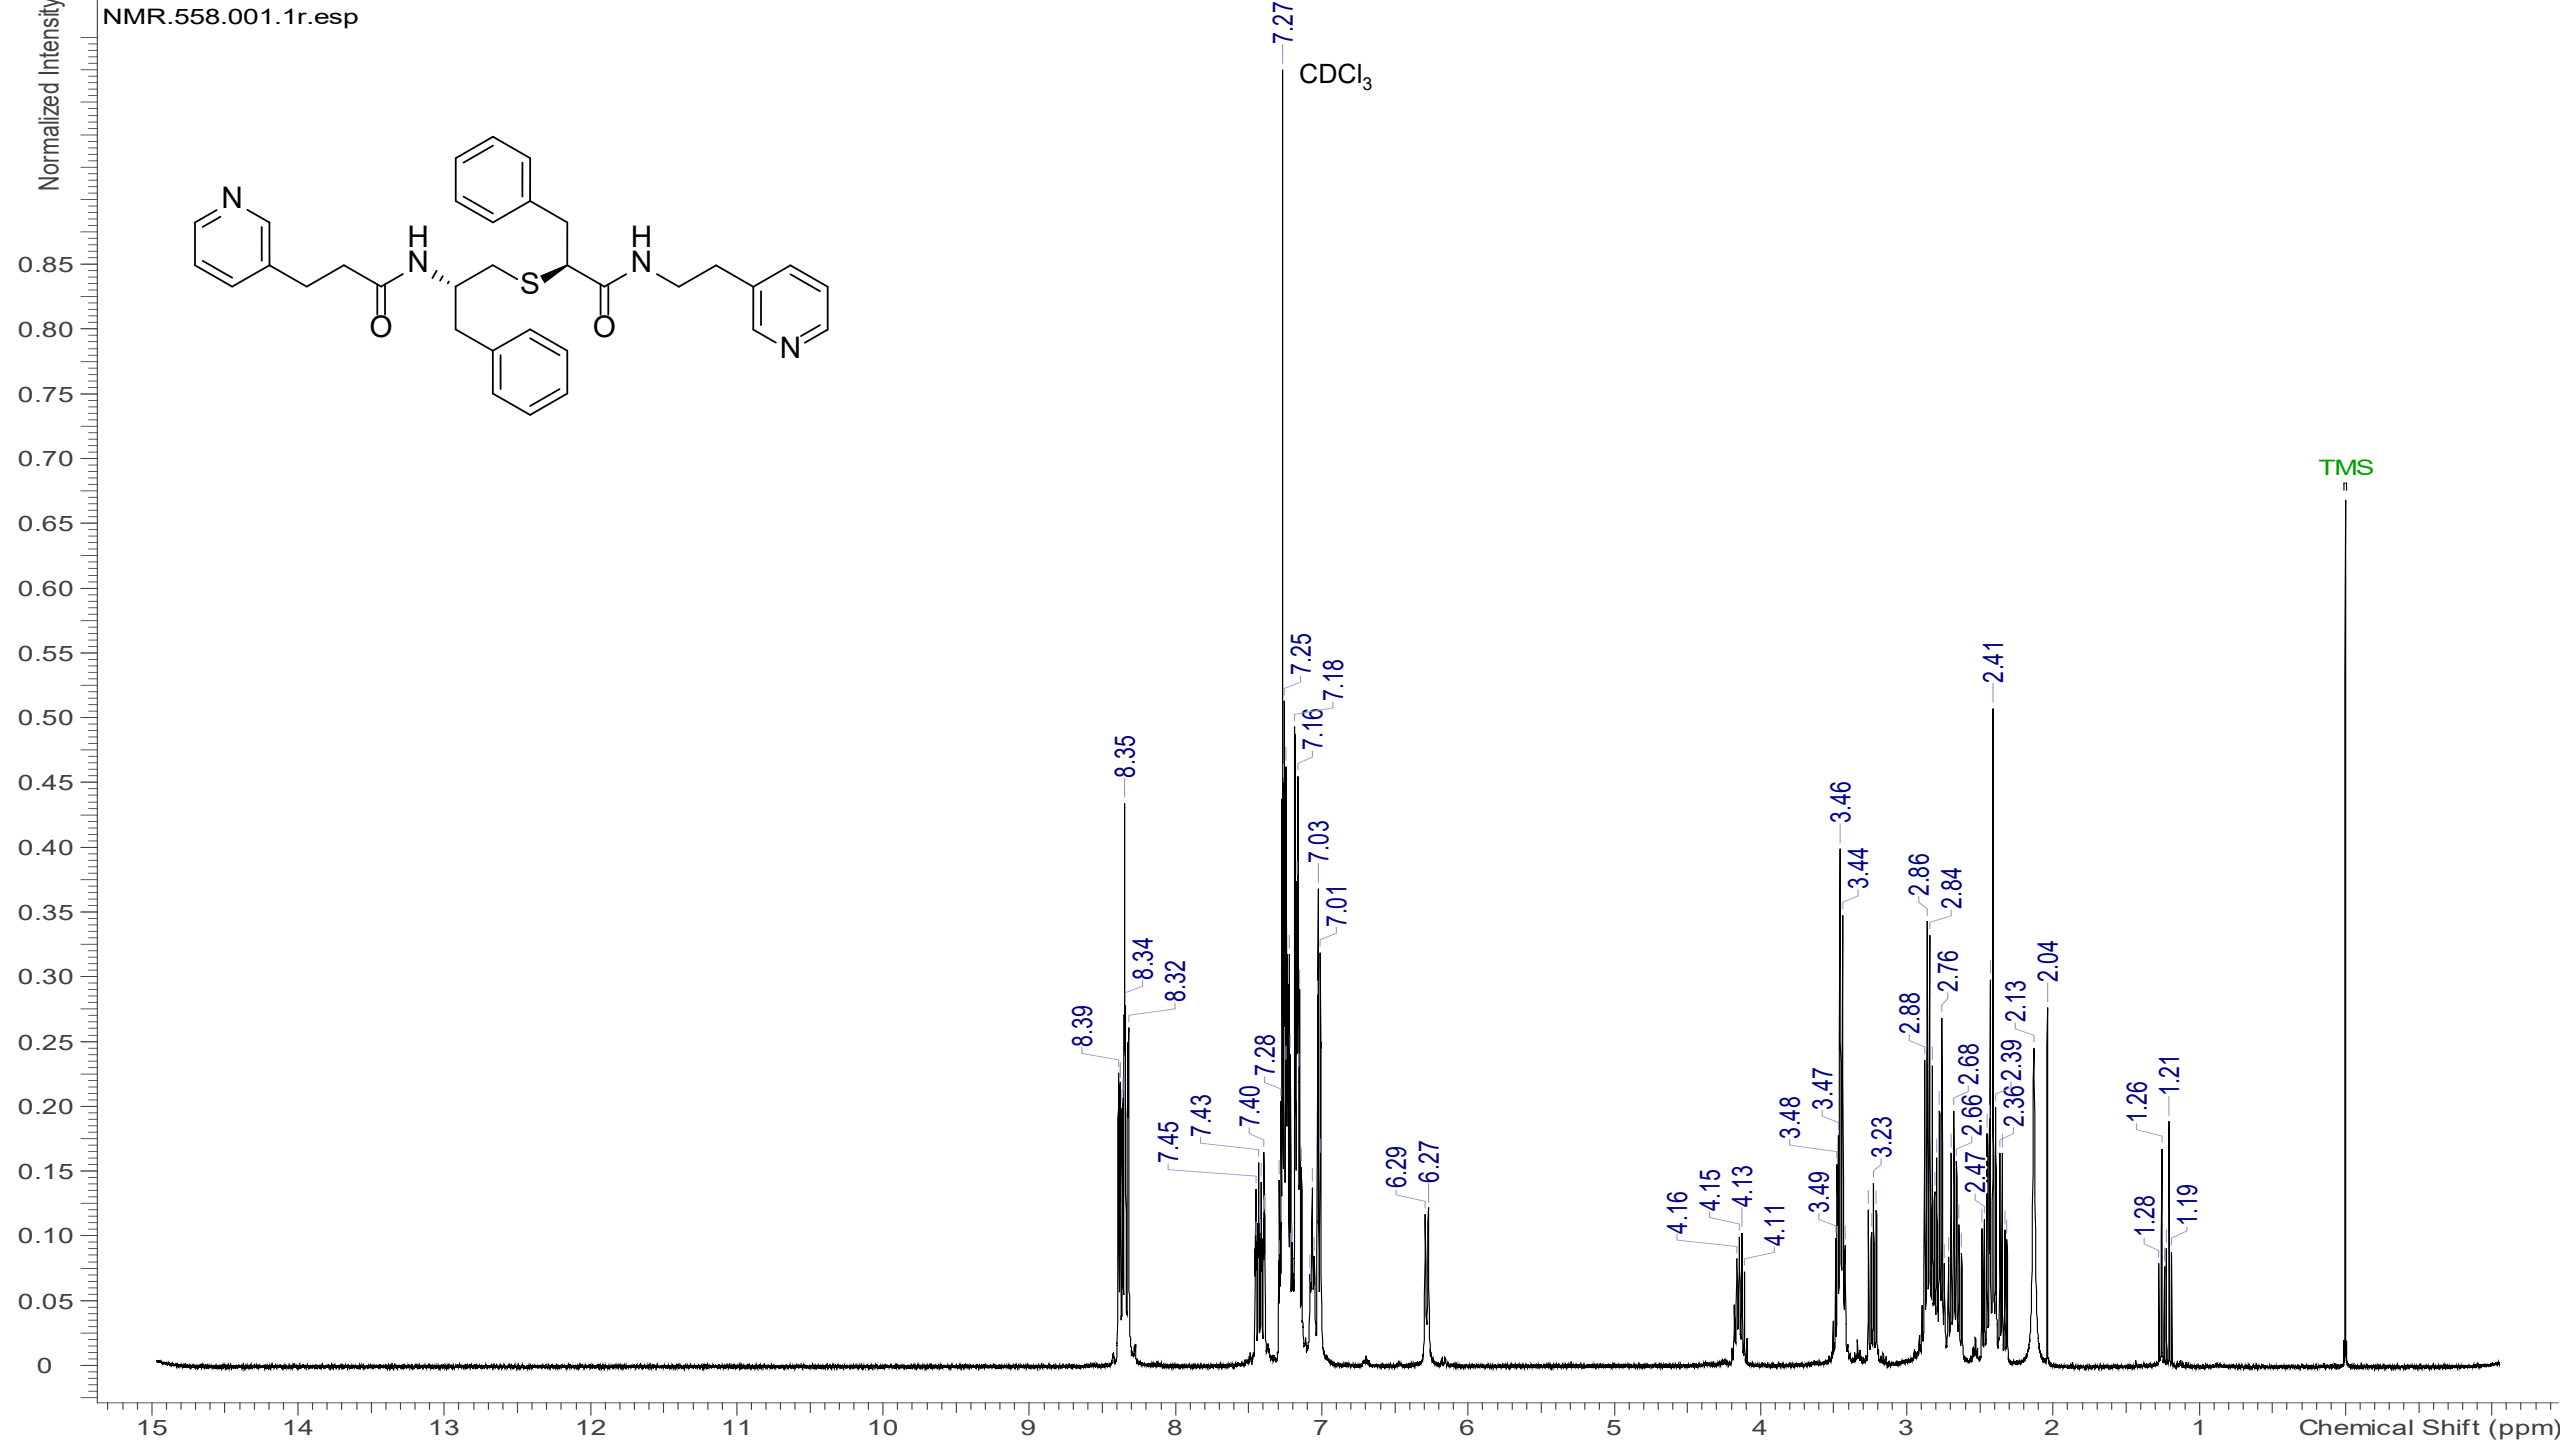

<sup>1</sup>H spectrum

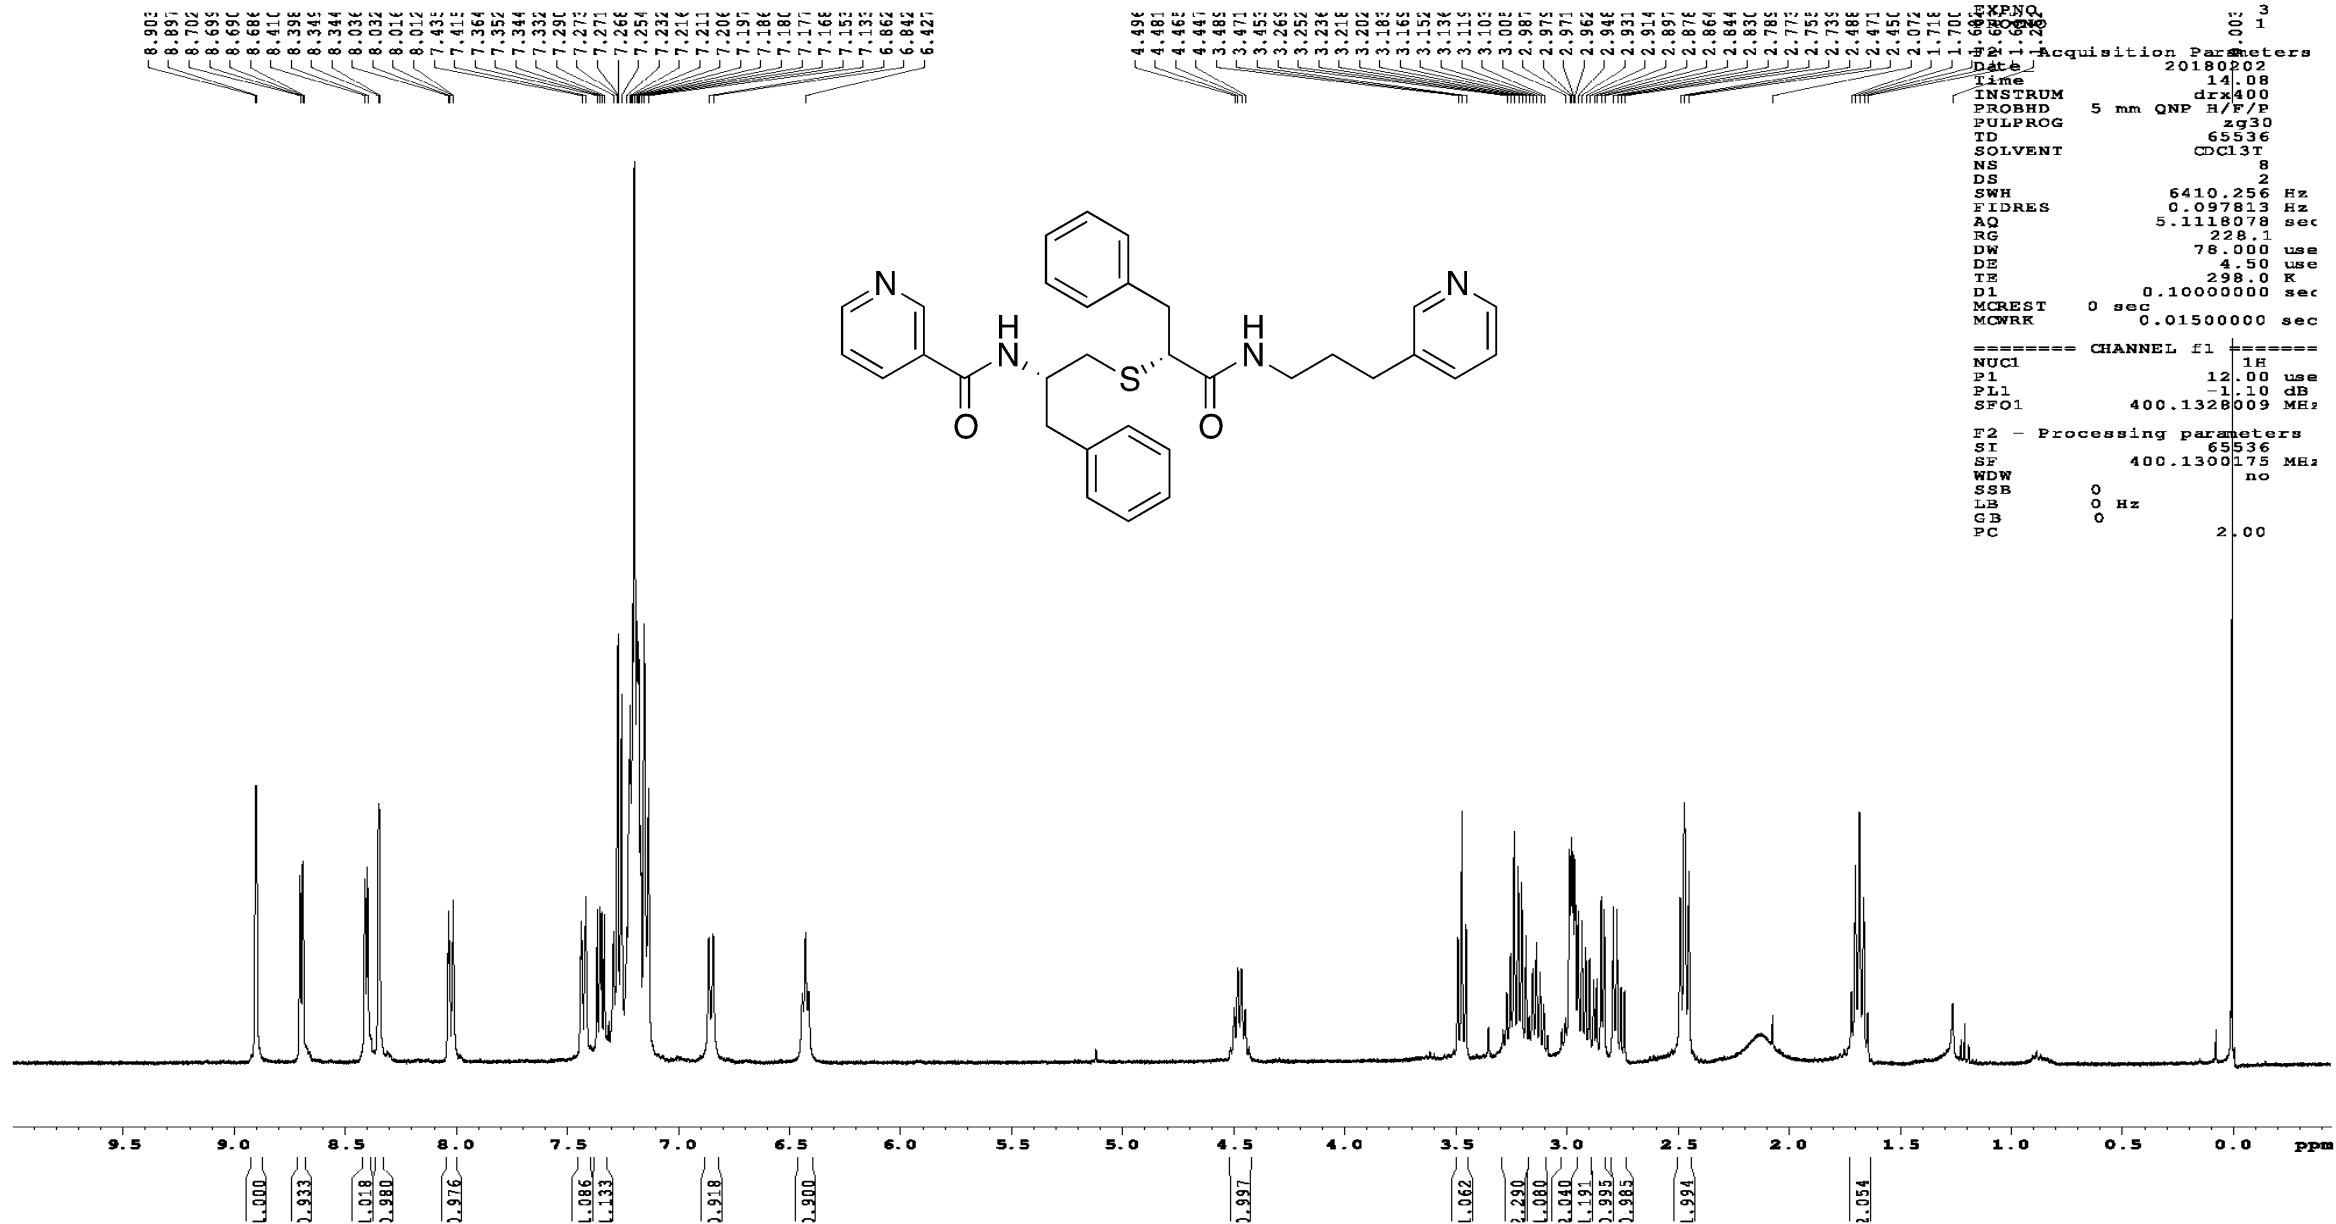

Current Data Parameters  
NAME 03ERS130  
EXPNO 3  
PROCNO 1  
Date\_ 20180202  
Time 14.08  
INSTRUM drx400  
PROBHD 5 mm QNP H/F/P  
PULPROG zgpg30  
TD 65536  
SOLVENT CDCl3  
NS 8  
DS 2  
SWH 6410.256 Hz  
FIDRES 0.097813 Hz  
AQ 5.1118078 sec  
RG 228.1  
DW 76.000 use  
DE 4.50 use  
TE 298.0 K  
D1 0.10000000 sec  
MCREST 0 sec  
MCWRK 0.01500000 sec

===== CHANNEL f1 =====  
NUC1 1H  
P1 12.00 use  
PL1 -1.10 dB  
SFO1 400.1328009 MHz

F2 - Processing parameters  
SI 65536  
SF 400.1300175 MHz  
WDW no  
SSB 0  
LB 0 Hz  
GB 0  
PC 2.00

<sup>1</sup>H spectrum

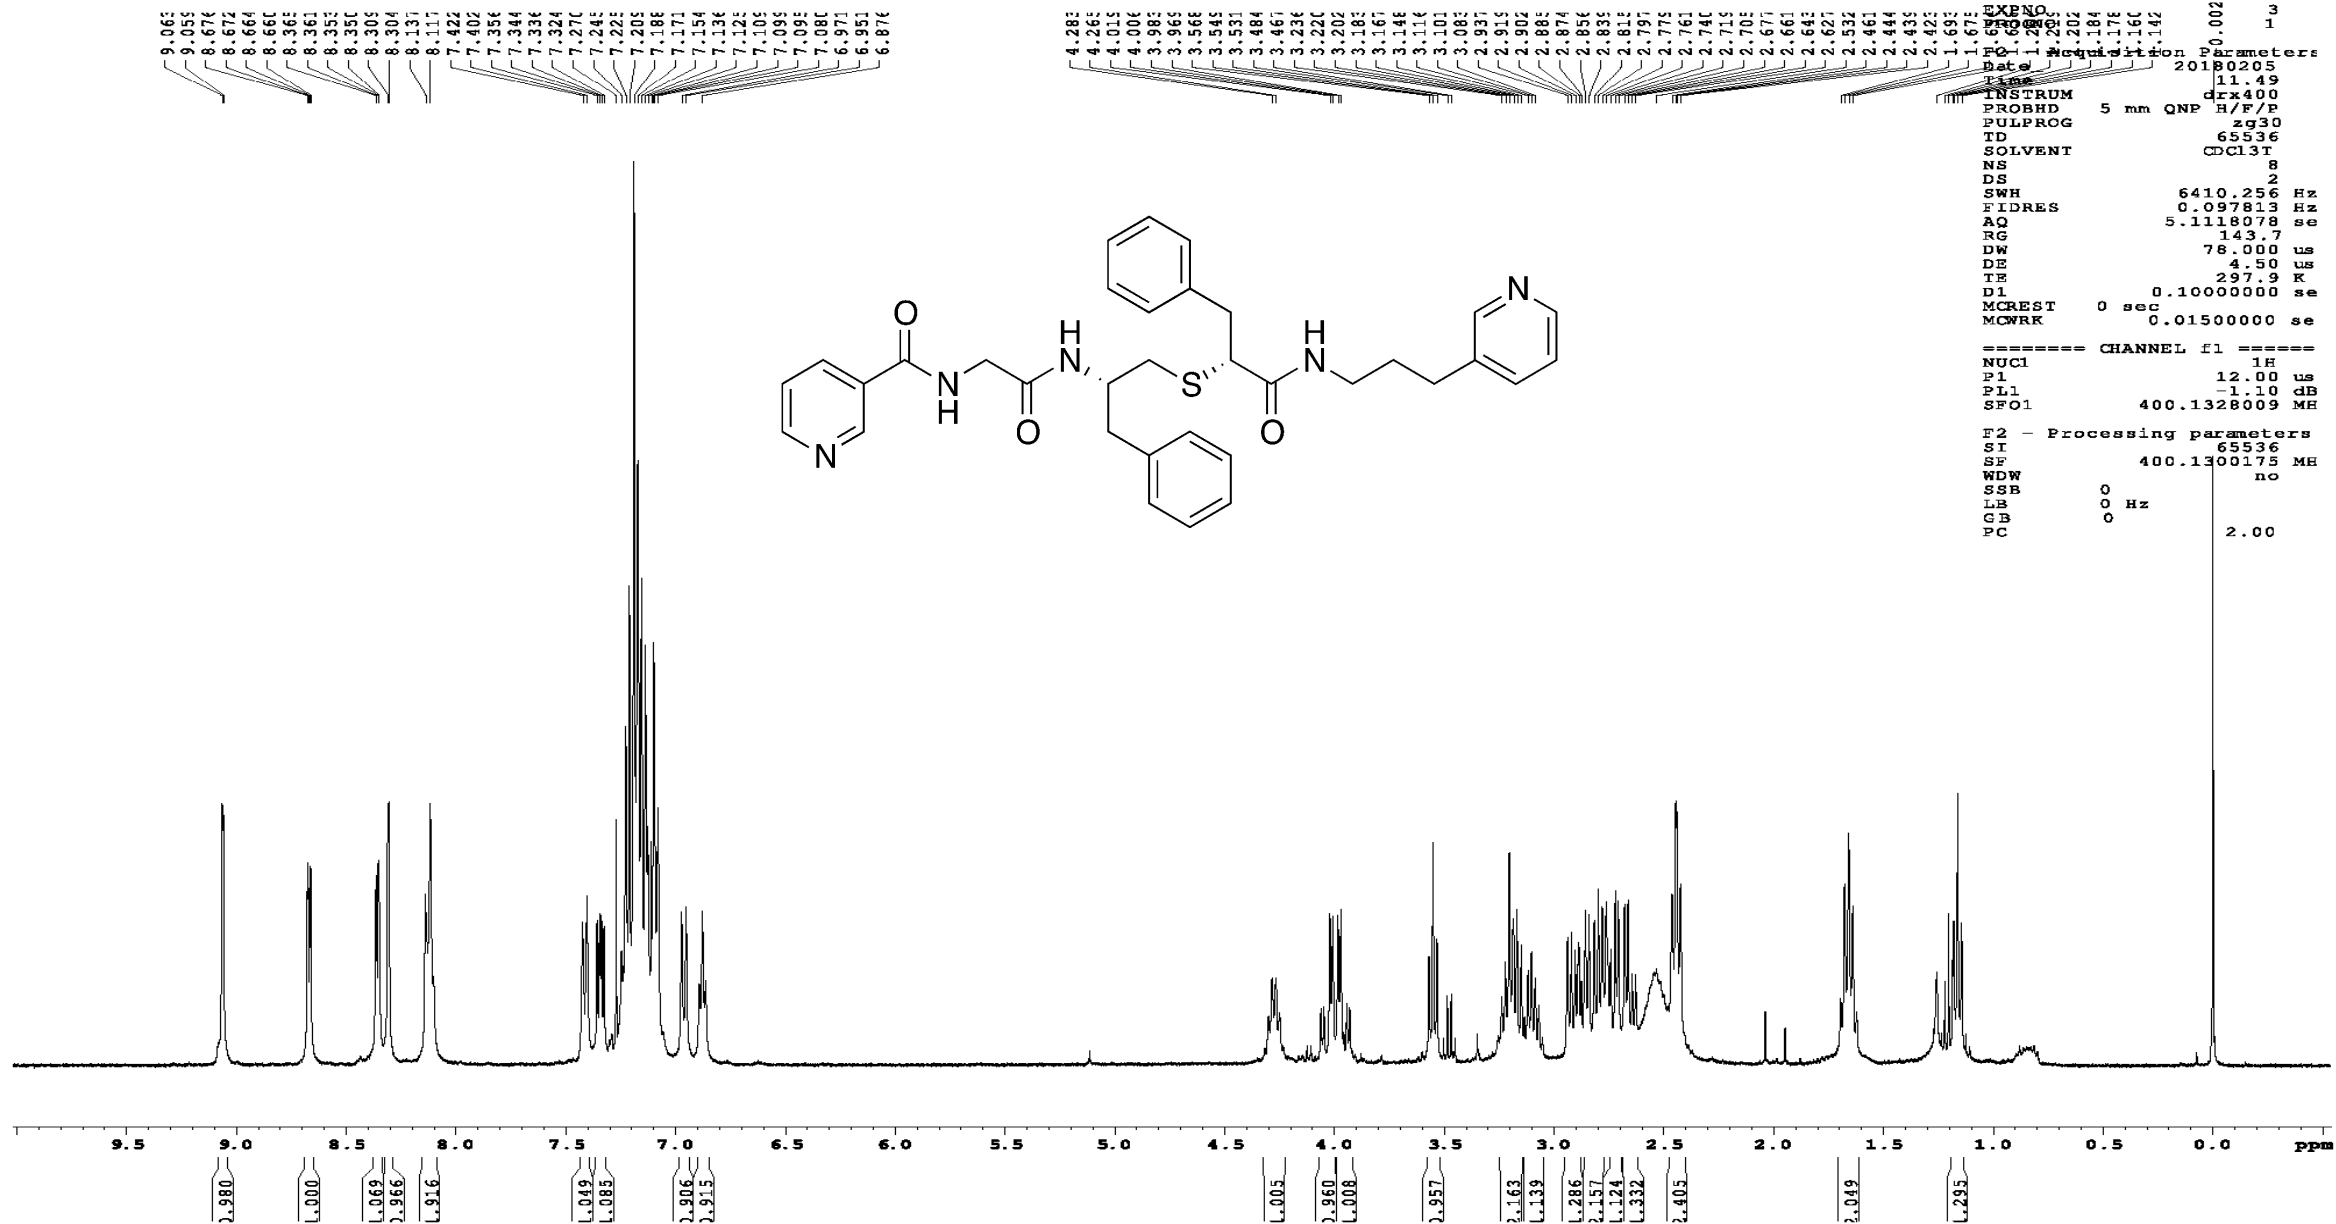

Supplement: s1 [file s1]
